# Supplementary material for: An efficient and facile synthesis of benzimidazo[1,2-a]benzimidazoles via copper-catalyzed domino addition/double cyclization
Source: Royal Society of Chemistry journal article supplement (doi:10.1039/c4ra01181c), 2014-01-01

*Electronic Supplementary Information (ESI)*

**An efficient and facile synthesis of benzimidazo[1,2-*a*]benzimidazoles via copper-catalyzed domino addition/double cyclization**

Guodong Yuan,<sup>§</sup> Haiquan Liu,<sup>§</sup> Jilong Gao, Hongjuan Xu, Liu Jiang, Xiaoxia Wang, and Xin Lv\*

<sup>a</sup> Zhejiang Key Laboratory for Reactive Chemistry on Solid Surfaces, College of Chemistry and Life Sciences, Zhejiang Normal University, Jinhua 321004, People's Republic of China.  
e-Mail: lvxin@zjnu.cn

**Table of Contents**

|                                                                                |         |
|--------------------------------------------------------------------------------|---------|
| General Information.....                                                       | P2      |
| General Procedure for the Synthesis of Product <b>3</b> .....                  | P2      |
| Spectral Data for the Products.....                                            | P3-P9   |
| References.....                                                                | P9      |
| Copies of <sup>1</sup> H and <sup>13</sup> C NMR Spectra for the Products..... | P10-P30 |

### **General Information.**

All domino reactions were performed in an oven-dried Schlenk tube equipped with a magnetic stir bar under nitrogen atmosphere. 1,4-Dioxane, DMF, toluene, and CH<sub>3</sub>CN were distilled from CaH<sub>2</sub>. Bis-(*o*-haloaryl)carbodiimides were prepared according to the known literature.<sup>1</sup> All other reagents were commercially available and used as received, if not stated otherwise. All melting points are uncorrected. The NMR spectra were recorded in CDCl<sub>3</sub> or *d*<sup>6</sup>-DMSO on a 400 MHz or 600 MHz instrument with TMS as internal standard. Chemical shifts ( $\delta$ ) were reported in ppm with respect to TMS. Data are represented as follows: chemical shift, multiplicity (s = singlet, d = doublet, t = triplet, q = quartet, m = multiplet, b = broad), coupling constant (J, Hz) and integration. TLC was carried out with 0.2 mm thick silica gel plates (GF254). Visualization was accomplished by UV light. The columns were hand packed with silica gel 60 (160-200 mesh). Key products were confirmed by high-resolution mass spectra (HRMS), which were carried out using a TOF-MS instrument with an ESI source.

### **General Procedure for the Synthesis of Product 3.**

An oven-dried Schlenk tube was charged with CuCl (0.05 mmol, 10 mol%), 1,10-phen·H<sub>2</sub>O (0.1 mmol, 20 mol%), and K<sub>3</sub>PO<sub>4</sub> (2.0 mmol, 4 equiv). The Schlenk tube was capped, and then evacuated and backfilled with N<sub>2</sub> (3 times). Under a positive pressure of nitrogen, a solution of active primary amine **2** (0.55 mmol, 1.1 equiv) in dioxane (1.5 mL) was added *via* syringe. The mixture was stirred at 60 °C for about 10 min. Then a solution of bis-(*o*-haloaryl)carbodiimide **1** (0.5 mmol, 1.0 equiv) in dioxane (1.5 mL) was added dropwise *via* syringe (for about 20 min). The Schlenk tube was sealed and allowed to prestir at 60 °C for 1 h. Then the mixture was stirred at 100 °C for 12 - 24 h. After being cooled to rt, the mixture was passed through a pad of silica gel and rinsed with EtOAc (30 mL). The combined filtrate was concentrated, and the residue was purified by column chromatography on silica gel using petrol/EtOAc (4:1, v:v) as eluent to afford product **3**.

## Spectral Data for the Products.

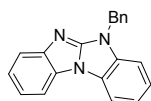

5-Benzyl-5*H*-benzo[*d*]benzo[4,5]imidazo[1,2-*a*]imidazole (**3a**). White solid. Mp: 156 – 158 °C. <sup>1</sup>H NMR (600 MHz, CDCl<sub>3</sub>): δ 7.80 – 7.83 (m, 2H), 7.76 – 7.78 (m, 1H), 7.43 (d, *J* = 7.4 Hz, 2H), 7.38 – 7.41 (m, 1H), 7.33 – 7.36 (m, 2H), 7.27 – 7.32 (m, 4H), 7.23 – 7.24 (m, 1H), 5.50 (s, 2H). <sup>13</sup>C NMR (150 MHz, CDCl<sub>3</sub>): δ 153.8, 147.3, 135.6, 135.4, 128.9, 128.4, 128.1, 127.4, 125.4, 123.1, 123.0, 121.3, 119.9, 118.5, 110.6, 110.21, 110.20, 47.0. HRMS (ESI): calcd for C<sub>20</sub>H<sub>16</sub>N<sub>3</sub> [M + H]<sup>+</sup> 298.1339, found 298.1330.

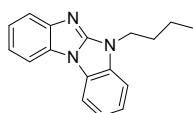

5-Butyl-5*H*-benzo[*d*]benzo[4,5]imidazo[1,2-*a*]imidazole (**3b**). White solid. Mp: 71 – 73 °C. <sup>1</sup>H NMR (400 MHz, CDCl<sub>3</sub>): δ 7.74 – 7.79 (m, 3H), 7.23 – 7.37 (m, 5H), 4.26 (t, *J* = 7.4 Hz, 2H), 1.93 – 2.00 (m, 2H), 1.43 – 1.52 (m, 2H), 0.98 (t, *J* = 7.4 Hz, 3H). <sup>13</sup>C NMR (100 MHz, CDCl<sub>3</sub>): δ 147.4, 135.6, 128.3, 125.2, 123.0, 122.9, 120.9, 119.7, 118.4, 110.6, 110.1, 110.0, 109.5, 43.2, 30.6, 20.2, 13.8. HRMS (ESI): calcd for C<sub>17</sub>H<sub>18</sub>N<sub>3</sub> [M + H]<sup>+</sup> 264.1495, found 264.1507.

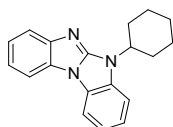

5-Cyclohexyl-5*H*-benzo[*d*]benzo[4,5]imidazo[1,2-*a*]imidazole (**3c**). White solid. Mp: 169 – 171 °C. <sup>1</sup>H NMR (600 MHz, CDCl<sub>3</sub>): δ 7.80 (d, *J* = 8.4 Hz, 2H), 7.77 (d, *J* = 7.8 Hz, 1H), 7.45 (d, *J* = 7.8 Hz, 1H), 7.33 – 7.38 (m, 2H), 7.25 – 7.31 (m, 2H), 4.43 – 4.48 (m, 1H), 2.42 – 2.49 (m, 2H), 2.10 – 2.12 (m, 2H), 2.02 – 2.04 (m, 2H), 1.82 – 1.84 (m, 1H), 1.43 – 1.59 (m, 3H). <sup>13</sup>C NMR (150 MHz, CDCl<sub>3</sub>): δ 153.1, 147.4, 134.9, 127.9, 125.3, 122.9, 122.8, 120.7, 119.6, 118.3, 110.6, 110.5, 110.0, 55.5, 30.6, 25.9, 25.2. HRMS (ESI): calcd for C<sub>19</sub>H<sub>20</sub>N<sub>3</sub> [M + H]<sup>+</sup> 290.1652, found 290.1647.

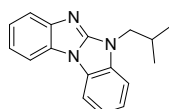

5-Isobutyl-5*H*-benzo[*d*]benzo[4,5]imidazo[1,2-*a*]imidazole (**3d**). Yellow solid. Mp: 128 – 130 °C. <sup>1</sup>H NMR (400 MHz, CDCl<sub>3</sub>): δ 7.74 – 7.80 (m, 3H), 7.25 – 7.35 (m, 5H), 4.06 (d, *J* = 7.6 Hz, 2H), 2.47 – 2.54 (m, 1H), 1.05 (d, *J* = 6.8 Hz, 6H). <sup>13</sup>C NMR (100 MHz, CDCl<sub>3</sub>): δ 153.8, 147.3, 136.0, 128.2, 125.1, 123.0, 122.9, 120.9, 119.7, 118.4, 110.6, 110.1, 109.8, 50.8, 28.2, 20.2. HRMS (ESI): calcd for C<sub>17</sub>H<sub>18</sub>N<sub>3</sub> [M + H]<sup>+</sup> 264.1495, found 264.1503.

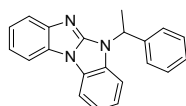

5-(1-Phenylethyl)-5*H*-benzo[*d*]benzo[4,5]imidazo[1,2-*a*]imidazole (**3e**). White solid. Mp: 84 – 86 °C. <sup>1</sup>H NMR (400 MHz, CDCl<sub>3</sub>): δ 7.82 (t, *J* = 7.9 Hz, 2H), 7.73 – 7.75 (m, 1H), 7.50 (d, *J* = 7.4 Hz, 2H), 7.33 – 7.39 (m, 3H), 7.15 – 7.31 (m, 4H), 7.08 (d, *J* = 7.6 Hz, 1H), 6.02 (q, *J* = 7.2 Hz, 1H), 2.19 (d, *J* = 7.2 Hz, 3H). <sup>13</sup>C NMR (100 MHz, CDCl<sub>3</sub>): δ 153.6, 147.4, 140.0, 134.5, 128.8, 128.1, 127.9, 126.6, 125.5, 123.0, 122.9, 121.0, 119.8, 118.5, 111.3, 110.6, 110.1, 54.2, 18.7. HRMS (ESI): calcd for C<sub>21</sub>H<sub>18</sub>N<sub>3</sub> [M + H]<sup>+</sup> 312.1495, found 312.1516.

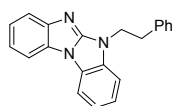

5-Phenethyl-5*H*-benzo[*d*]benzo[4,5]imidazo[1,2-*a*]imidazole (**3f**). Yellow solid. Mp: 126 – 128 °C. <sup>1</sup>H NMR (400 MHz, CDCl<sub>3</sub>): δ 7.79 (d, *J* = 8.4 Hz, 2H), 7.71 – 7.73 (m, 1H), 7.35 – 7.40 (m, 1H), 7.20 – 7.30 (m, 8H), 7.08 – 7.10 (m, 1H), 4.48 (t, *J* = 7.6 Hz, 2H), 3.28 (t, *J* = 7.6 Hz, 2H). <sup>13</sup>C NMR (100 MHz, CDCl<sub>3</sub>): δ 153.3, 147.4, 137.9, 135.5, 128.9, 128.7, 128.3, 126.8, 125.1, 123.0, 122.9, 121.0, 119.8, 118.4, 110.6, 110.2, 109.5, 45.0, 34.8. HRMS (ESI): calcd for C<sub>21</sub>H<sub>18</sub>N<sub>3</sub> [M + H]<sup>+</sup> 312.1495, found 312.1489.

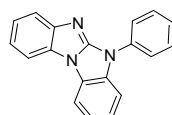

5-Phenyl-5*H*-benzo[*d*]benzo[4,5]imidazo[1,2-*a*]imidazole (**3g**). White solid. Mp: 144 – 146 °C. <sup>1</sup>H NMR (400 MHz, CDCl<sub>3</sub>): δ 7.78 – 7.85 (m, 5H), 7.62 (t, *J* = 7.8 Hz, 2H), 7.52 – 7.54 (m, 1H), 7.43 – 7.47 (m, 1H), 7.27 – 7.38 (m, 4H). <sup>13</sup>C NMR (100 MHz,

CDCl<sub>3</sub>):  $\delta$  152.5, 147.1, 135.2, 135.0, 130.1, 128.0, 127.5, 125.5, 124.4 (d,  $J$  = 17.6 Hz), 123.3, 123.1, 122.1, 120.3, 119.0, 110.8, 110.7, 110.2. HRMS (ESI): calcd for C<sub>19</sub>H<sub>14</sub>N<sub>3</sub> [M + H]<sup>+</sup> 284.1182, found 284.1171.

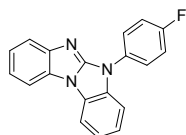

5-(4-Fluorophenyl)-5*H*-benzo[*d*]benzo[4,5]imidazo[1,2-*a*]imidazole (**3h**). White solid. Mp: 190 – 192 °C. <sup>1</sup>H NMR (600 MHz, CDCl<sub>3</sub>):  $\delta$  7.79 – 7.87 (m, 5H), 7.50 (d,  $J$  = 7.9 Hz, 1H), 7.33 – 7.42 (m, 6H). <sup>13</sup>C NMR (150 MHz, CDCl<sub>3</sub>):  $\delta$  162.4, 160.8, 152.6, 147.0, 135.2, 126.7 (d,  $J$  = 8.4 Hz), 125.6, 123.4, 123.2, 122.3, 120.4, 119.0, 117.1, 116.9, 110.9, 110.5, 110.2. HRMS (ESI): calcd for C<sub>19</sub>H<sub>13</sub>FN<sub>3</sub> [M + H]<sup>+</sup> 302.1088, found 302.1094.

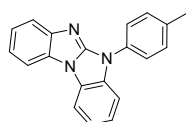

5-(*p*-Tolyl)-5*H*-benzo[*d*]benzo[4,5]imidazo[1,2-*a*]imidazole (**3i**). White solid. Mp: 162 – 164 °C. <sup>1</sup>H NMR (600 MHz, CDCl<sub>3</sub>):  $\delta$  7.83 – 7.87 (m, 2H), 7.80 (d,  $J$  = 8.0 Hz, 1H), 7.72 (d,  $J$  = 8.2 Hz, 2H), 7.53 (d,  $J$  = 7.8 Hz, 1H), 7.44 (d,  $J$  = 8.2 Hz, 2H), 7.30 – 7.40 (m, 4H), 2.49 (s, 3H). <sup>13</sup>C NMR (150 MHz, CDCl<sub>3</sub>):  $\delta$  152.8, 147.2, 137.7, 135.3, 132.5, 130.6, 128.1, 125.5, 124.6, 123.3, 123.1, 121.9, 120.2, 118.9, 110.8, 110.7, 110.2, 21.27. HRMS (ESI): calcd for C<sub>20</sub>H<sub>16</sub>N<sub>3</sub> [M + H]<sup>+</sup> 298.1339, found 298.1346.

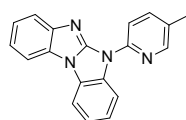

5-(5-Methylpyridin-2-yl)-5*H*-benzo[*d*]benzo[4,5]imidazo[1,2-*a*]imidazole (**3j**). White solid. Mp: 156 – 158 °C. <sup>1</sup>H NMR (600 MHz, CDCl<sub>3</sub>):  $\delta$  8.76 – 8.78 (m, 1H), 8.68 (d,  $J$  = 8.4 Hz, 1H), 8.42 (s, 1H), 7.85 (d,  $J$  = 8.4 Hz, 2H), 7.77 – 7.80 (m, 2H), 7.39 – 7.42 (m, 3H), 7.34 – 7.36 (m, 1H), 2.43 (s, 3H). <sup>13</sup>C NMR (150 MHz, CDCl<sub>3</sub>):  $\delta$  151.4, 148.8, 148.0, 146.8, 139.3, 133.9, 129.9, 127.6, 125.7, 123.7, 123.2, 120.8, 119.1, 116.4, 114.6, 110.3, 110.1, 18.0. HRMS (ESI): calcd for C<sub>19</sub>H<sub>15</sub>N<sub>4</sub> [M + H]<sup>+</sup> 299.1291, found 299.1287.

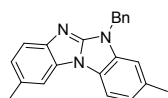

5-Benzyl-3,9-dimethyl-5*H*-benzo[*d*]benzo[4,5]imidazo[1,2-*a*]imidazole (**3k**). White solid. Mp: 195 – 197 °C. <sup>1</sup>H NMR (400 MHz, CDCl<sub>3</sub>): δ 7.60 – 7.63 (m, 3H), 7.34 – 7.40 (m, 5H), 7.07 – 7.19 (m, 2H), 7.01 (s, 1H), 5.44 (s, 2H), 2.58 (s, 3H), 2.46 (s, 3H). <sup>13</sup>C NMR (150 MHz, CDCl<sub>3</sub>): δ 153.8, 145.1, 135.8, 135.7, 133.1, 129.6, 128.9, 128.6, 128.0, 127.3, 123.9, 123.4, 121.9, 118.0, 110.5, 110.4, 110.2, 46.8, 21.8, 21.7. HRMS (ESI): calcd for C<sub>22</sub>H<sub>20</sub>N<sub>3</sub> [M + H]<sup>+</sup> 326.1652, found 326.1645.

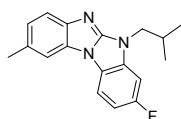

3-Fluoro-5-isobutyl-9-methyl-5*H*-benzo[*d*]benzo[4,5]imidazo[1,2-*a*]imidazole (**3l**). Yellow solid. Mp: 140 – 142 °C. <sup>1</sup>H NMR (600 MHz, CDCl<sub>3</sub>): δ 7.63 – 7.65 (m, 1H), 7.54 (d, *J* = 7.8 Hz, 1H), 7.44 – 7.46 (m, 1H), 7.05 – 7.11 (m, 3H), 4.00 (d, *J* = 7.8 Hz, 2H), 2.51 (s, 3H), 2.46 – 2.50 (m, 1H), 1.05 (d, *J* = 6.6 Hz, 6H). <sup>13</sup>C NMR (150 MHz, CDCl<sub>3</sub>): δ 158.1, 156.5, 154.4, 143.4, 136.2, 133.5, 127.6, 122.7, 121.6, 118.4 (d, *J* = 9.6 Hz), 110.1 (q, *J* = 20.8 Hz), 100.0, 97.5 (d, *J* = 28.2 Hz), 50.8, 28.1, 21.9, 20.2. HRMS (ESI): calcd for C<sub>18</sub>H<sub>19</sub>FN<sub>3</sub> [M + H]<sup>+</sup> 296.1558, found 296.1575.

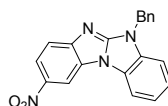

5-Benzyl-9-nitro-5*H*-benzo[*d*]benzo[4,5]imidazo[1,2-*a*]imidazole (**3m**). White solid. Mp: 160 – 162 °C. <sup>1</sup>H NMR (600 MHz, CDCl<sub>3</sub>): δ 7.83 (d, *J* = 7.8 Hz, 1H), 7.78 – 7.81 (m, 2H), 7.44 (d, *J* = 7.2 Hz, 2H), 7.40 (t, *J* = 7.2 Hz, 1H), 7.33 – 7.36 (m, 2H), 7.30 – 7.32 (m, 3H), 7.25 (d, *J* = 7.6 Hz, 1H), 5.52 (s, 2H). <sup>13</sup>C NMR (150MHz, CDCl<sub>3</sub>): δ 153.7, 135.5, 135.4, 128.9, 128.4, 128.1, 127.4, 125.5, 123.2, 123.1, 121.4, 120.0, 118.5, 110.6, 110.25, 110.20, 47.1. HRMS (ESI): calcd for C<sub>20</sub>H<sub>15</sub>N<sub>4</sub>O<sub>2</sub> [M + H]<sup>+</sup> 343.1190, found 343.1213.

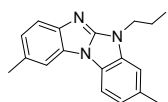

3,9-Dimethyl-5-propyl-5*H*-benzo[*d*]benzo[4,5]imidazo[1,2-*a*]imidazole (**3n**). Yellow

solid. Mp: 133 – 135 °C. <sup>1</sup>H NMR (400 MHz, CDCl<sub>3</sub>): δ 7.56 – 7.64 (m, 3H), 7.15 (d, *J* = 7.9 Hz, 1H), 7.06 – 7.10 (m, 2H), 4.18 (t, *J* = 7.4 Hz, 2H), 2.57 (s, 3H), 2.52 (s, 3H), 1.98 – 2.04 (m, 2H), 1.06 (t, *J* = 7.4 Hz, 3H). <sup>13</sup>C NMR (150 MHz, CDCl<sub>3</sub>): δ 153.6, 145.2, 135.9, 132.9, 129.3, 128.4, 123.8, 123.2, 121.4, 117.8, 110.3, 110.1, 109.9, 44.9, 21.8, 21.7, 21.6, 11.4. HRMS (ESI): calcd for C<sub>18</sub>H<sub>20</sub>N<sub>3</sub> [M + H]<sup>+</sup> 278.1652, found 278.1648.

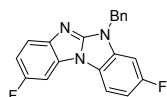

5-Benzyl-3,9-difluoro-5*H*-benzo[*d*]benzo[4,5]imidazo[1,2-*a*]imidazole (**3o**). White solid. Mp: 217-219 °C. <sup>1</sup>H NMR (600 MHz, CDCl<sub>3</sub>): δ 7.67 – 7.70 (m, 1H), 7.60 – 7.63 (m, 1H), 7.48 – 7.49 (m, 1H), 7.43 (d, *J* = 7.2 Hz, 2H), 7.36 – 7.38 (m, 2H), 7.32 – 7.34 (m, 1H), 7.11 – 7.14 (m, 1H), 7.00 – 7.03 (m, 1H), 6.95 – 6.97 (m, 1H), 5.44 (s, 2H). <sup>13</sup>C NMR (150 MHz, CDCl<sub>3</sub>): δ 160.4, 158.8, 156.9, 134.8, 129.1, 128.4, 127.5, 119.0, 118.9, 110.9, 111.0, 110.6, 110.5, 108.2, 108.1, 98.6 (d, *J* = 28.4 Hz), 97.5 (d, *J* = 28.4 Hz), 47.3. HRMS (ESI): calcd for C<sub>20</sub>H<sub>14</sub>F<sub>2</sub>N<sub>3</sub> [M + H]<sup>+</sup> 334.1150, found 334.1165.

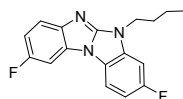

5-Butyl-3,9-difluoro-5*H*-benzo[*d*]benzo[4,5]imidazo[1,2-*a*]imidazole (**3p**). White solid. Mp: 235 – 237 °C. <sup>1</sup>H NMR (600 MHz, CDCl<sub>3</sub>): δ 7.63 – 7.65 (m, 1H), 7.57 – 7.59 (m, 1H), 7.42 – 7.44 (m, 1H), 7.00 – 7.10 (m, 3H), 4.21 (t, *J* = 7.2 Hz, 2H), 1.94 – 1.98 (m, 2H), 1.46 – 1.50 (m, 2H), 1.01 (t, *J* = 7.4 Hz, 3H). <sup>13</sup>C NMR (150 MHz, CDCl<sub>3</sub>): δ 160.4, 158.3, 156.7, 143.2, 136.5 (d, *J* = 12.4 Hz), 127.5 (d, *J* = 12.4 Hz), 121.3, 118.7 (d, *J* = 9.6 Hz), 110.8 (d, *J* = 10.6 Hz), 110.3 (d, *J* = 24.0 Hz), 107.6 (d, *J* = 24.0 Hz), 97.8 (d, *J* = 28.4 Hz), 97.4 (d, *J* = 28.4 Hz), 43.5, 30.4, 20.2, 13.7. HRMS (ESI): calcd for C<sub>17</sub>H<sub>16</sub>F<sub>2</sub>N<sub>3</sub> [M + H]<sup>+</sup> 300.1307, found 300.1331.

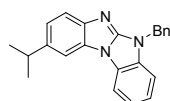

5-Benzyl-9-isopropyl-5*H*-benzo[*d*]benzo[4,5]imidazo[1,2-*a*]imidazole (**3q**). White solid. Mp 146 – 148 °C. <sup>1</sup>H NMR (600 MHz, CDCl<sub>3</sub>): δ 7.80 (t, *J* = 7.6 Hz, 2H), 7.67 (d, *J* = 8.0 Hz, 1H), 7.45 (d, *J* = 7.4 Hz, 2H), 7.38 – 7.42 (m, 1H), 7.36 (t, *J* = 7.8 Hz, 2H), 7.28 – 7.33 (m, 2H), 7.17 – 7.18 (m, 1H), 7.10 (s, 1H), 5.49 (s, 2H), 3.00 – 3.07 (m, 1H), 1.31 (d, *J* = 6.9 Hz, 6H). <sup>13</sup>C NMR (150 MHz, CDCl<sub>3</sub>): δ 154.0, 147.2, 144.6,

135.7, 135.6, 128.9, 128.4, 128.0, 127.5, 123.6, 122.8, 119.8, 119.5, 118.4, 110.4, 110.1, 108.2, 46.9, 34.4, 24.4. HRMS (ESI): calcd for C<sub>23</sub>H<sub>22</sub>N<sub>3</sub> [M + H]<sup>+</sup> 340.1808, found 340.1800.

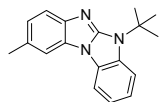

5-(*tert*-Butyl)-9-methyl-5*H*-benzo[*d*]benzo[4,5]imidazo[1,2-*a*]imidazole (**3r**). Yellow viscous liquid. <sup>1</sup>H NMR (600 MHz, CDCl<sub>3</sub>): δ 7.68 (s, 1H), 7.58 – 7.61 (m, 1H), 7.29 – 7.35 (m, 2H), 7.16 (t, *J* = 7.6 Hz, 1H), 6.98 – 7.00 (m, 1H), 6.68 – 6.73 (m, 1H), 2.49 (s, 3H), 1.53 (s, 9H). <sup>13</sup>C NMR (150 MHz, CDCl<sub>3</sub>): δ 151.9, 143.2, 141.9, 140.9, 135.0, 130.5, 130.2, 123.2, 121.6, 119.6, 116.5, 107.8, 52.2, 29.4, 21.1. HRMS (ESI): calcd for C<sub>18</sub>H<sub>20</sub>N<sub>3</sub> [M + H]<sup>+</sup> 278.1652, found 278.1643.

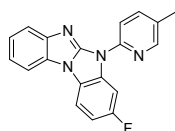

3-Fluoro-5-(5-methylpyridin-2-yl)-5*H*-benzo[*d*]benzo[4,5]imidazo[1,2-*a*]imidazole (**3s**). White solid. Mp 165 – 167 °C. <sup>1</sup>H NMR (600 MHz, CDCl<sub>3</sub>): δ 8.75 – 8.78 (m, 1H), 8.60 – 8.69 (m, 1H), 8.42 (s, 1H), 7.70 – 7.85 (m, 3H), 7.46 – 7.54 (m, 1H), 7.34 – 7.41 (m, 2H), 7.09 – 7.15 (m, 1H), 2.43 (s, 3H). <sup>13</sup>C NMR (150 MHz, CDCl<sub>3</sub>): δ 147.9, 139.2, 133.9, 129.9, 125.3, 124.0, 123.7, 123.1, 122.8, 119.4 (d, *J* = 10.0 Hz), 116.5, 114.5, 110.8, 110.6, 110.3, 110.1, 97.8, 97.6, 18.0. HRMS (ESI): calcd for C<sub>19</sub>H<sub>14</sub>FN<sub>4</sub> [M + H]<sup>+</sup> 317.1197, found 317.1175.

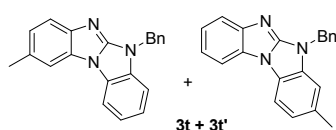

5-Benzyl-9-methyl-5*H*-benzo[*d*]benzo[4,5]imidazo[1,2-*a*]imidazole + 5-benzyl-3-methyl-5*H*-benzo[*d*]benzo[4,5]imidazo[1,2-*a*]imidazole (**3t** + **3t'**). White solid.

Major (approximate attribution): <sup>1</sup>H NMR (600 MHz, CDCl<sub>3</sub>): δ 7.78 – 7.81 (m, 2H), 7.65 – 7.66 (m, 1H), 7.29 – 7.44 (m, 7H), 7.09 – 7.12 (m, 1H), 7.05 (s, 1H), 5.48 (s, 2H), 2.48 (s, 3H). <sup>13</sup>C NMR (150 MHz, CDCl<sub>3</sub>): δ 142.0, 135.7, 133.3, 128.9, 128.4, 128.0, 127.3, 123.0, 122.8, 122.1, 119.8, 118.5, 110.6, 110.3, 110.1, 46.9, 21.8.

Minor (approximate attribution): <sup>1</sup>H NMR (600 MHz, CDCl<sub>3</sub>): δ 7.83 – 7.84 (m, 2H), 7.61 (m, 1H), 7.29 – 7.44 (m, 7H), 7.18 – 7.21 (m, 1H), 7.03 (s, 1H), 5.51 (s, 2H),



2.59 (s, 3H).  $^{13}\text{C}$  NMR (150 MHz,  $\text{CDCl}_3$ ):  $\delta$  141.5, 135.6, 133.2, 129.0, 128.4, 128.0, 127.4, 123.0, 122.8, 122.1, 119.8, 118.5, 110.6, 110.3, 110.1, 47.0, 22.1.

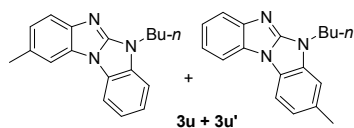

5-Butyl-9-methyl-5H-benzo[d]benzo[4,5]imidazo[1,2-a]imidazole + 5-butyl-3-methyl-5H-benzo[d]benzo[4,5]imidazo[1,2-a]imidazole (**3u** + **3u'**). White solid.

Major (approximate attribution):  $^1\text{H}$  NMR (600 MHz,  $\text{CDCl}_3$ ):  $\delta$  7.75 (d,  $J = 7.9$  Hz, 1H), 7.62 – 7.66 (m, 1H), 7.42 (d,  $J = 7.9$  Hz, 1H), 7.30 – 7.33 (m, 1H), 7.16 – 7.25 (m, 2H), 6.94 – 6.98 (m, 1H), 4.12 – 4.16 (m, 2H), 2.44 (s, 3H), 1.89 – 1.91 (m, 2H), 1.43 – 1.46 (m, 2H), 0.95 – 0.98 (m, 3H).  $^{13}\text{C}$  NMR (150 MHz,  $\text{CDCl}_3$ ):  $\delta$  153.5, 147.2, 135.6, 132.9, 128.1, 123.0, 122.8, 122.6, 121.5, 119.2, 118.2, 110.4, 109.9, 43.1, 30.6, 21.8, 20.2, 13.8.

Minor (approximate attribution):  $^1\text{H}$  NMR (600 MHz,  $\text{CDCl}_3$ ):  $\delta$  7.75 (d,  $J = 7.9$  Hz, 1H), 7.57 – 7.58 (m, 1H), 7.42 (d,  $J = 7.9$  Hz, 1H), 7.30 – 7.33 (m, 1H), 7.11 – 7.12 (m, 2H), 6.94 – 6.98 (m, 1H), 4.12 – 4.16 (m, 2H), 2.50 (s, 3H), 1.89 – 1.91 (m, 2H), 1.43 – 1.46 (m, 2H), 0.95 – 0.98 (m, 3H).  $^{13}\text{C}$  NMR (150 MHz,  $\text{CDCl}_3$ ):  $\delta$  153.5, 147.3, 135.1, 132.8, 129.2, 125.0, 123.7, 122.9, 120.7, 119.6, 118.3, 110.3, 109.3, 43.1, 30.6, 21.7, 20.2, 13.8.

## References:

1. F. L. Zeng and H. Alper, *Org. Lett.* 2010, **12**, 3642-3644.



**3b:**

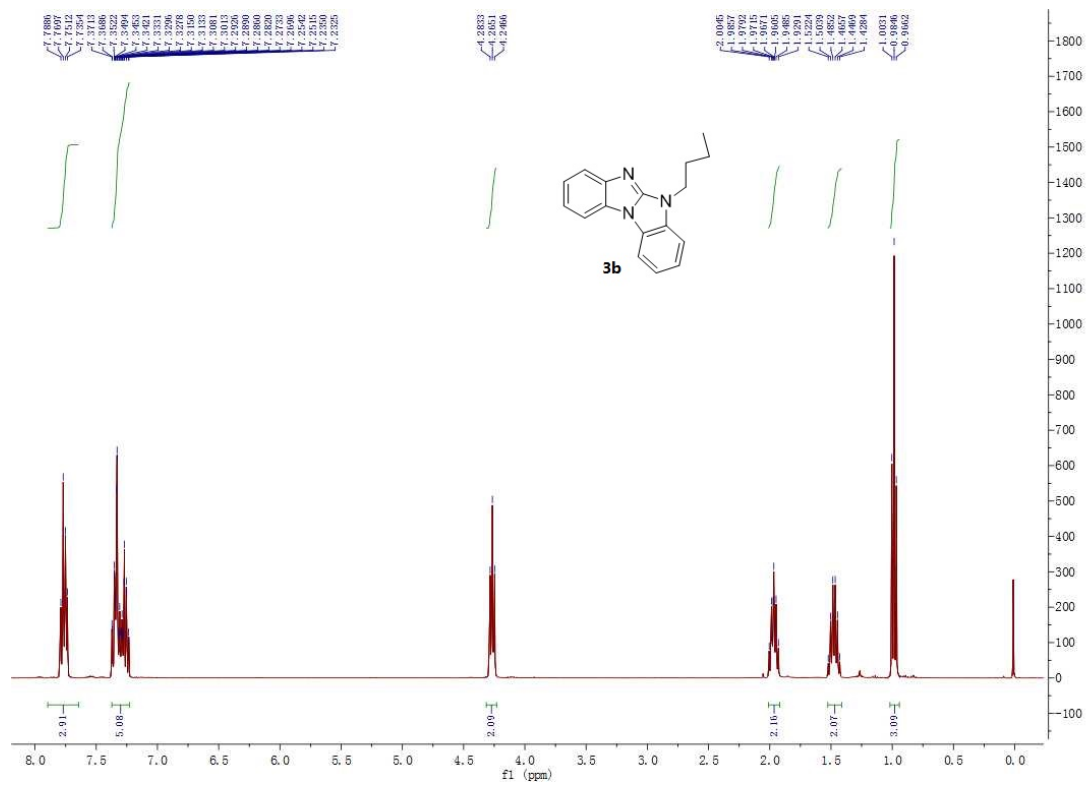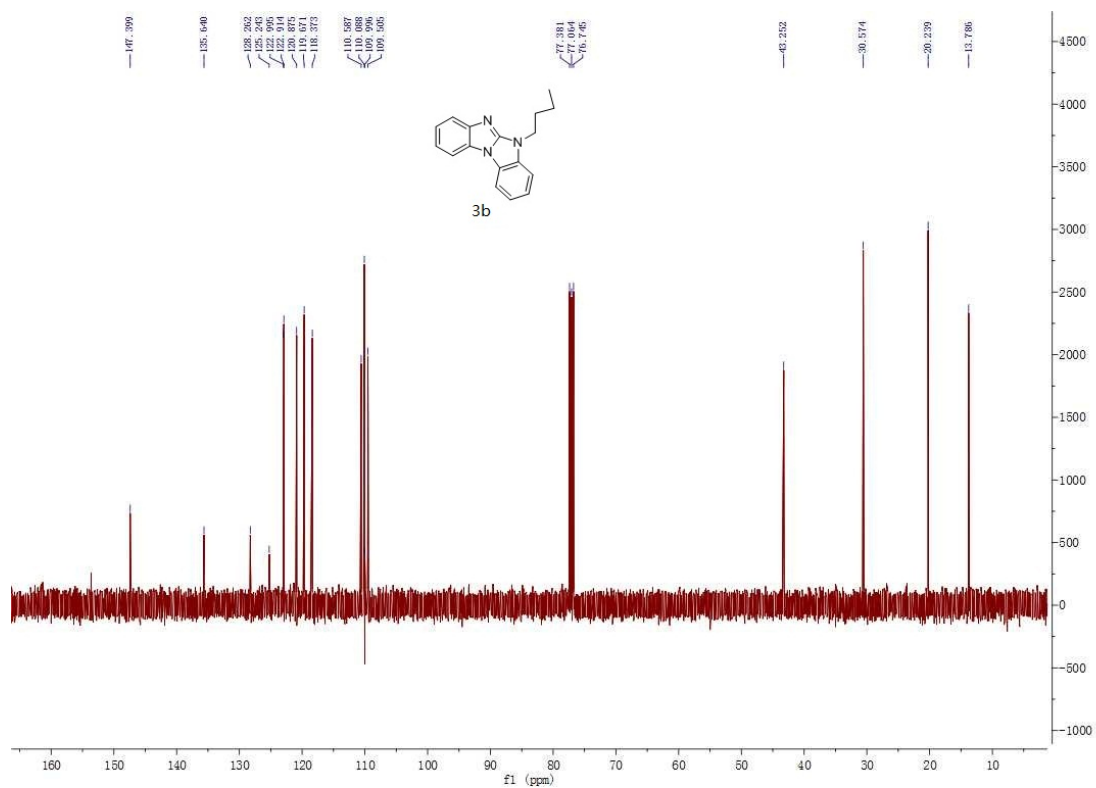

3c:

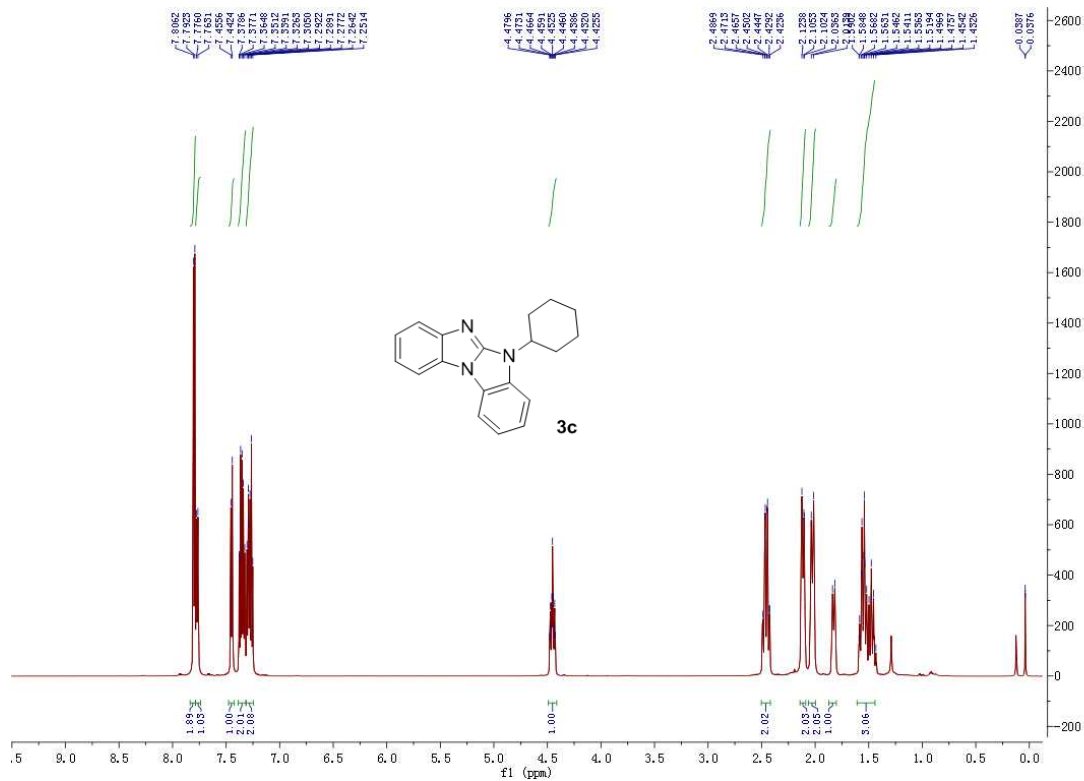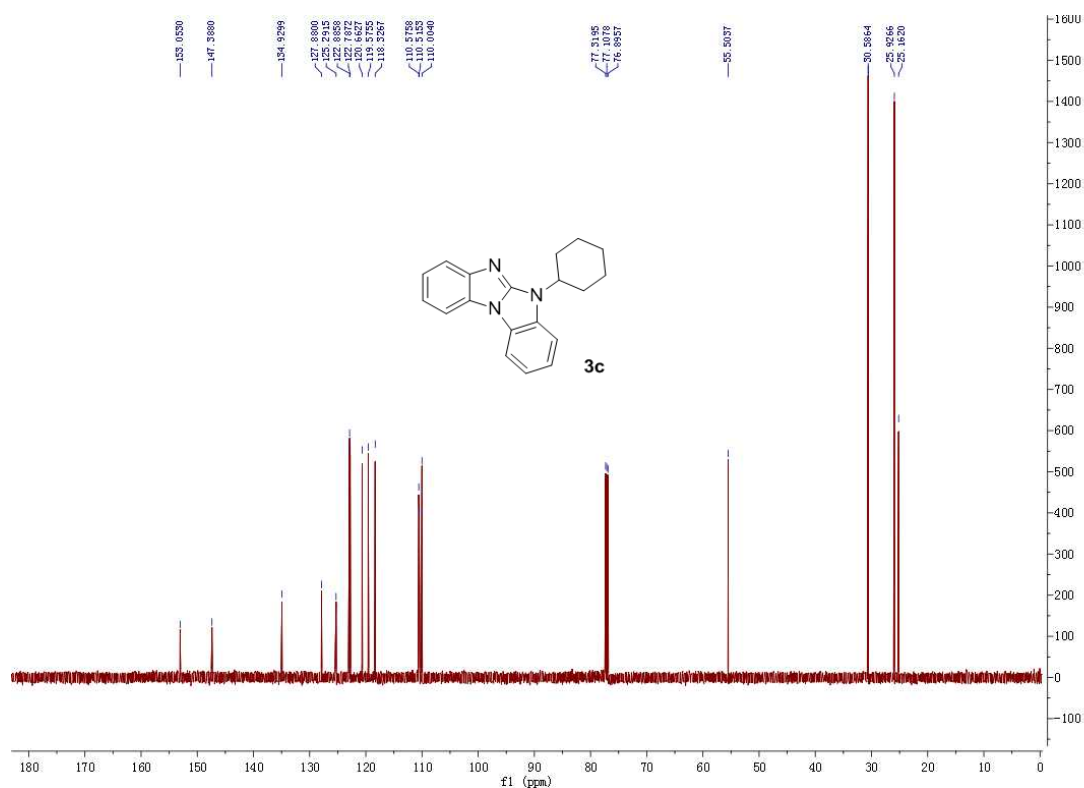

3d:

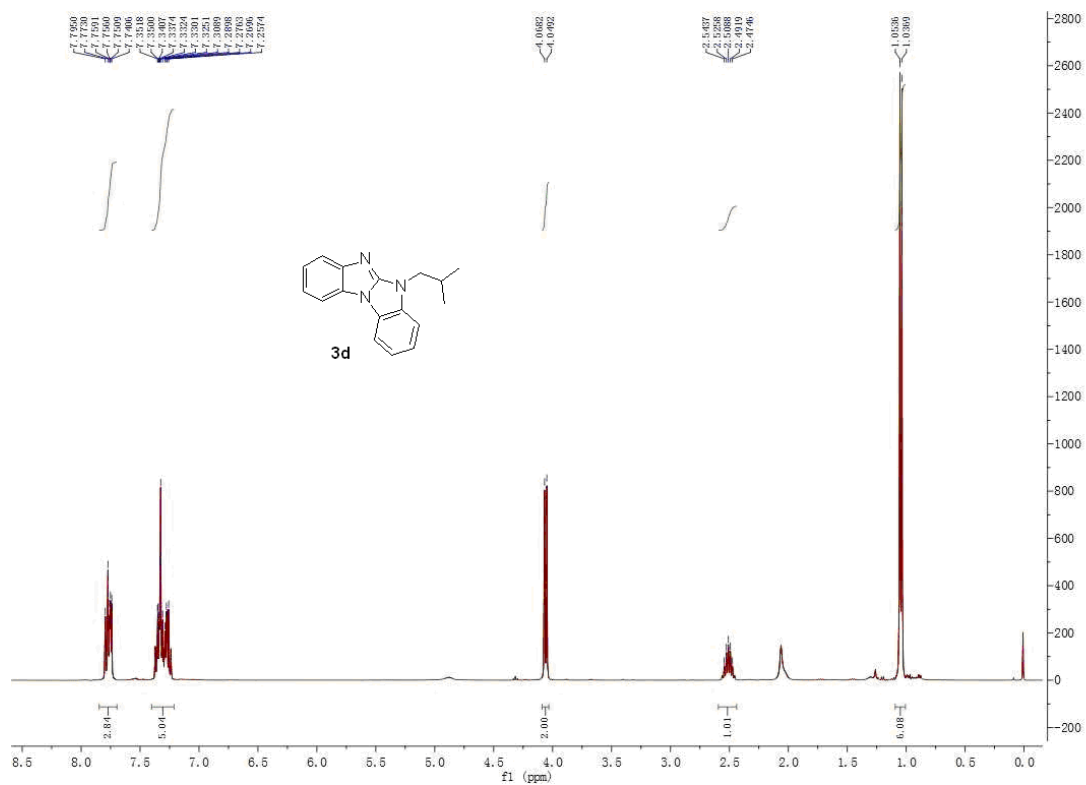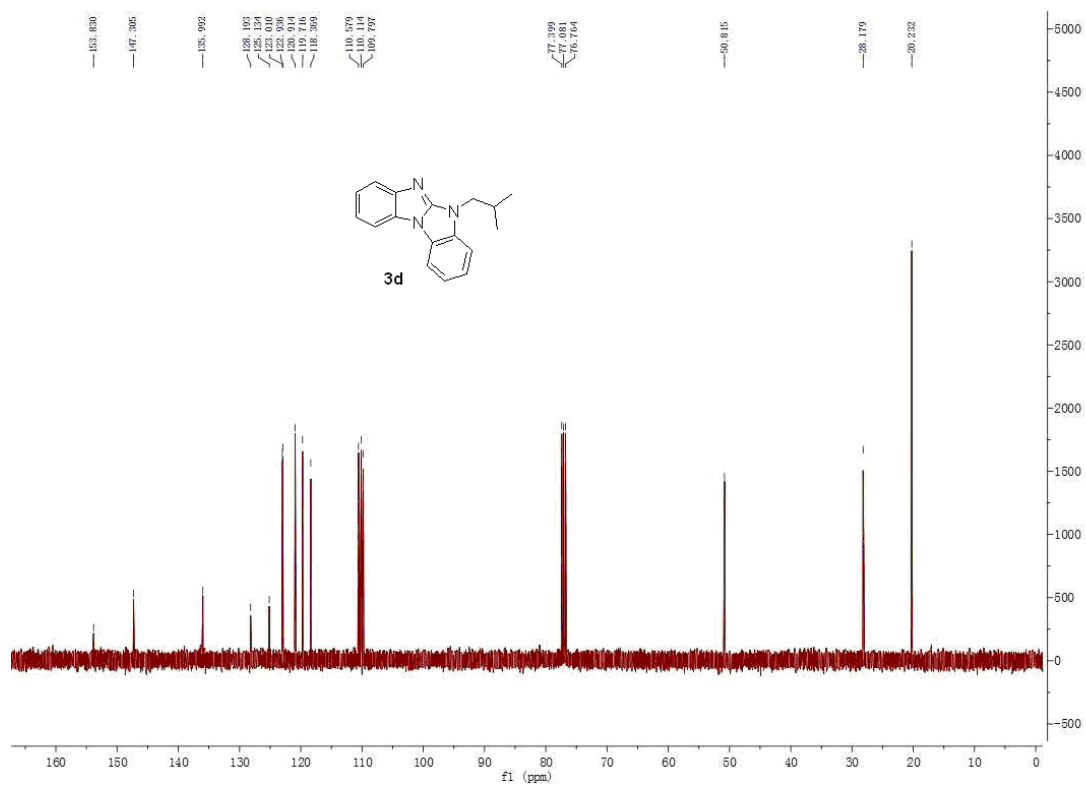

3e:

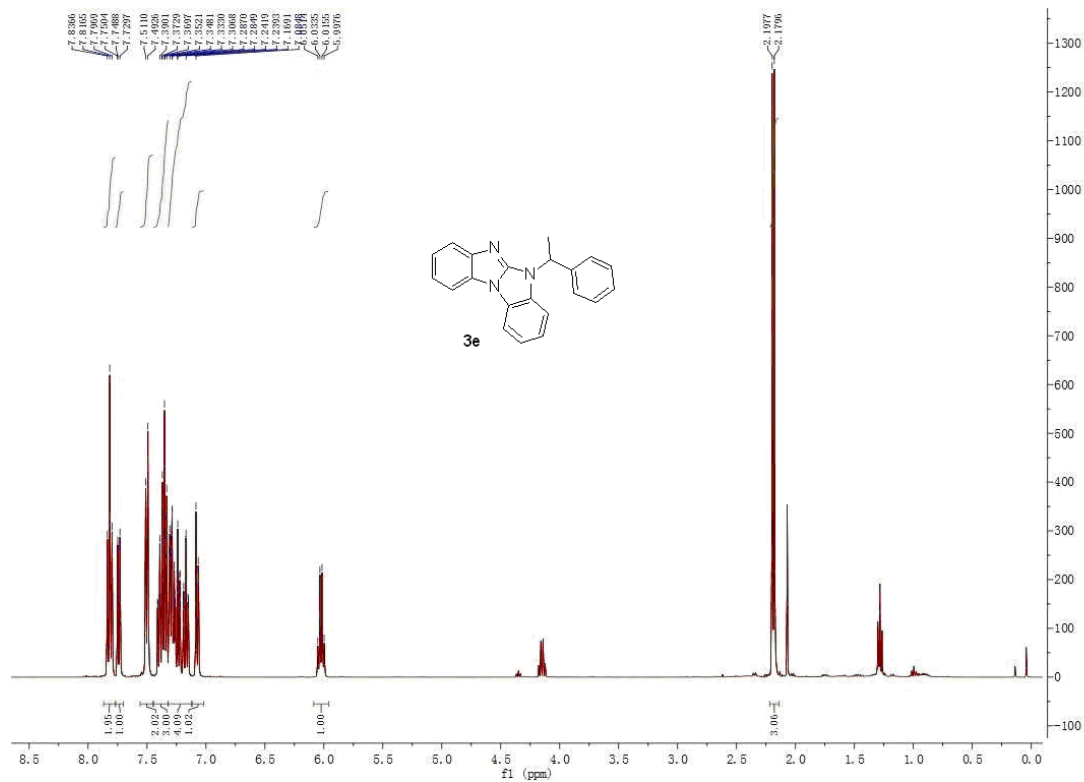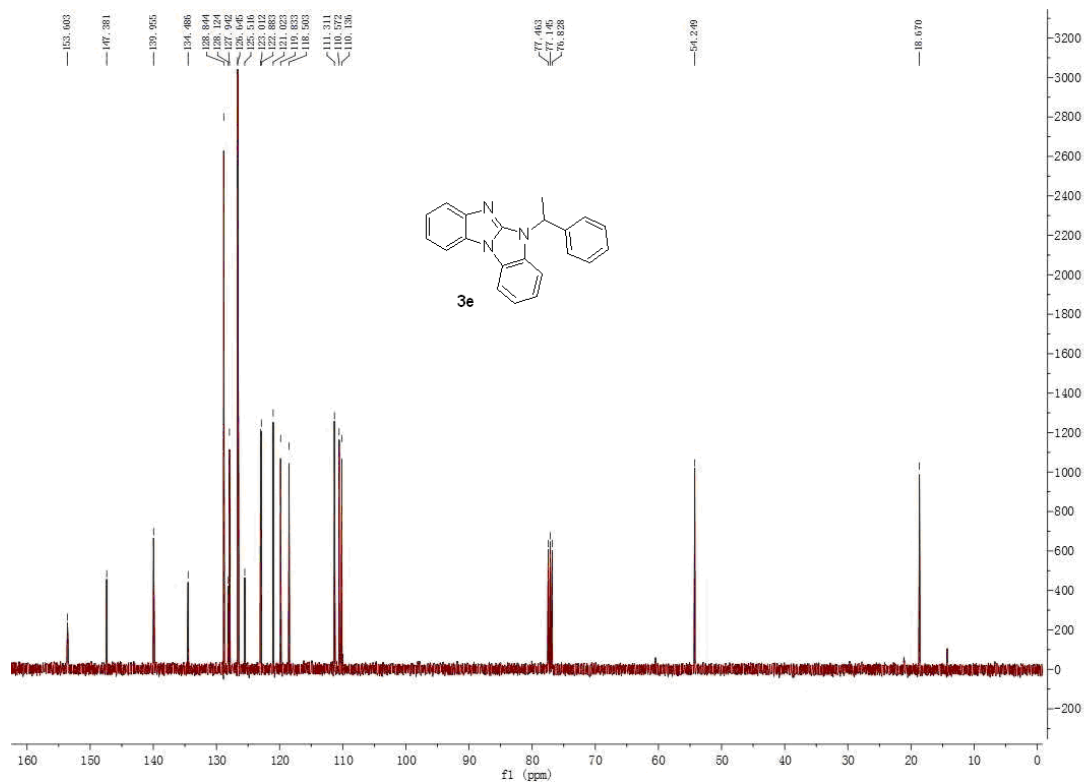

3f:

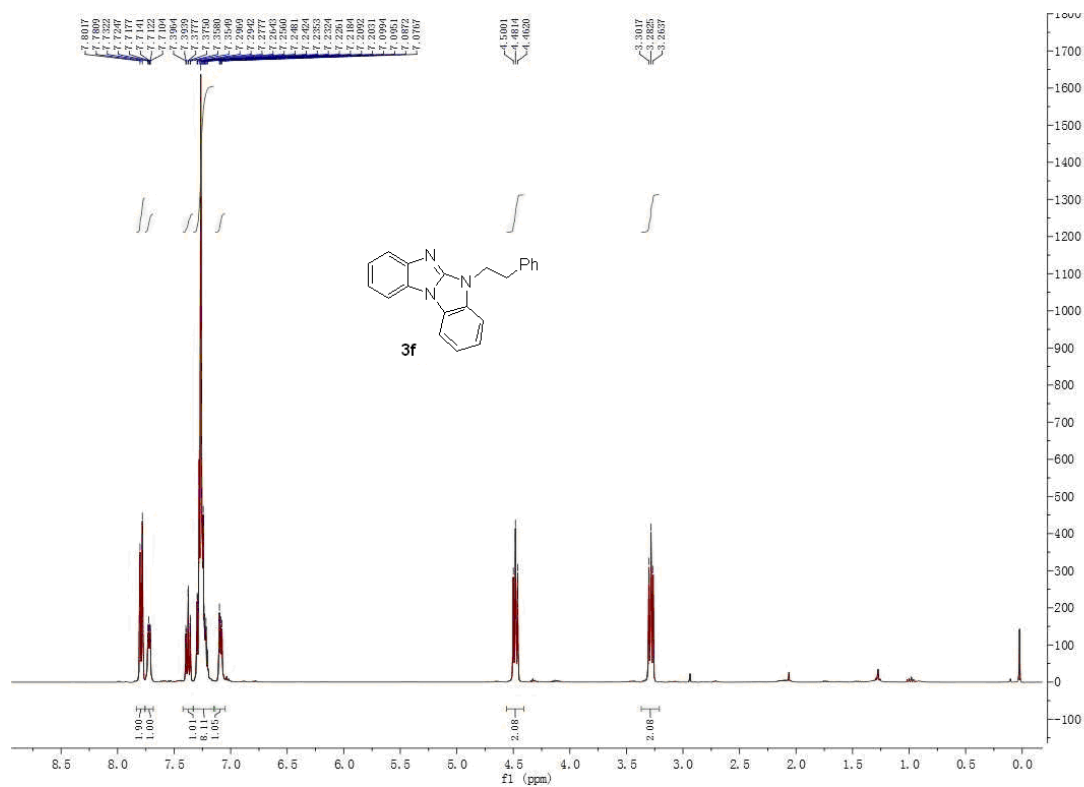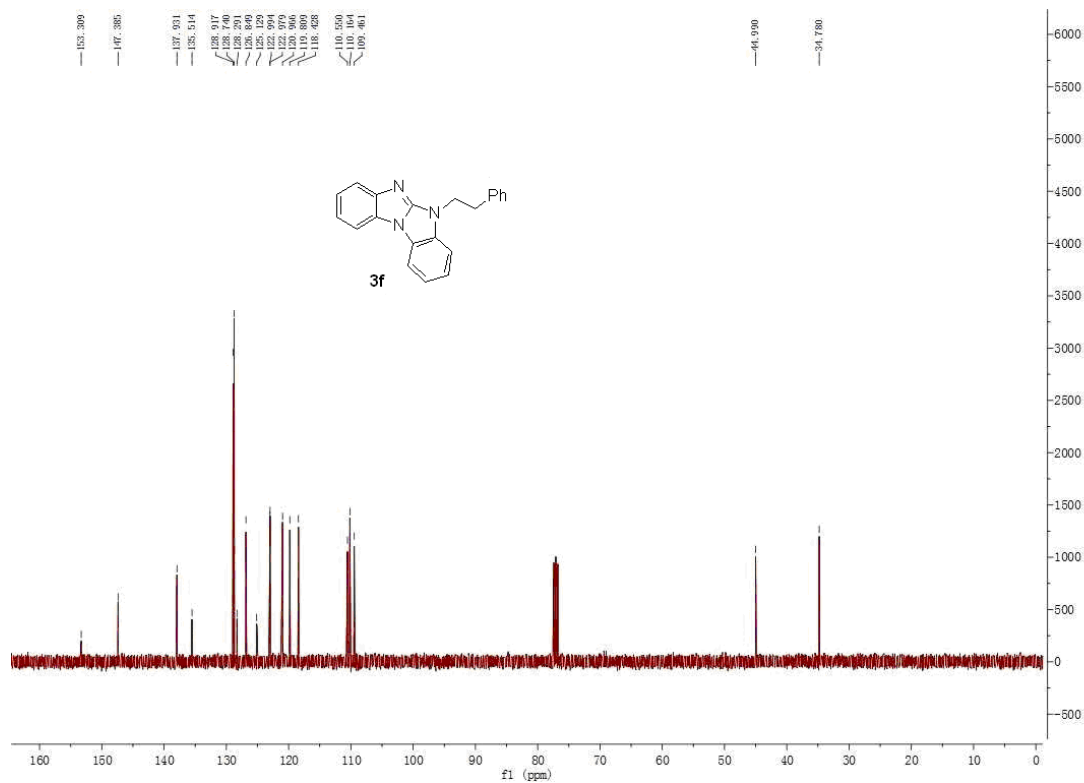

3g:

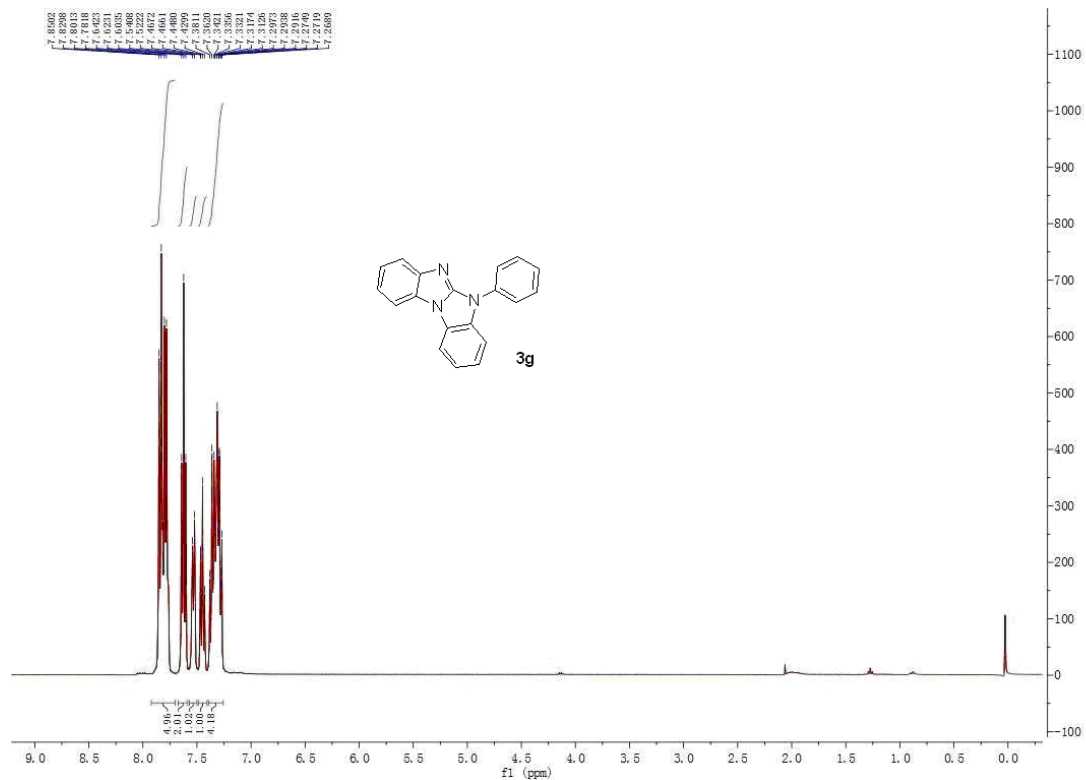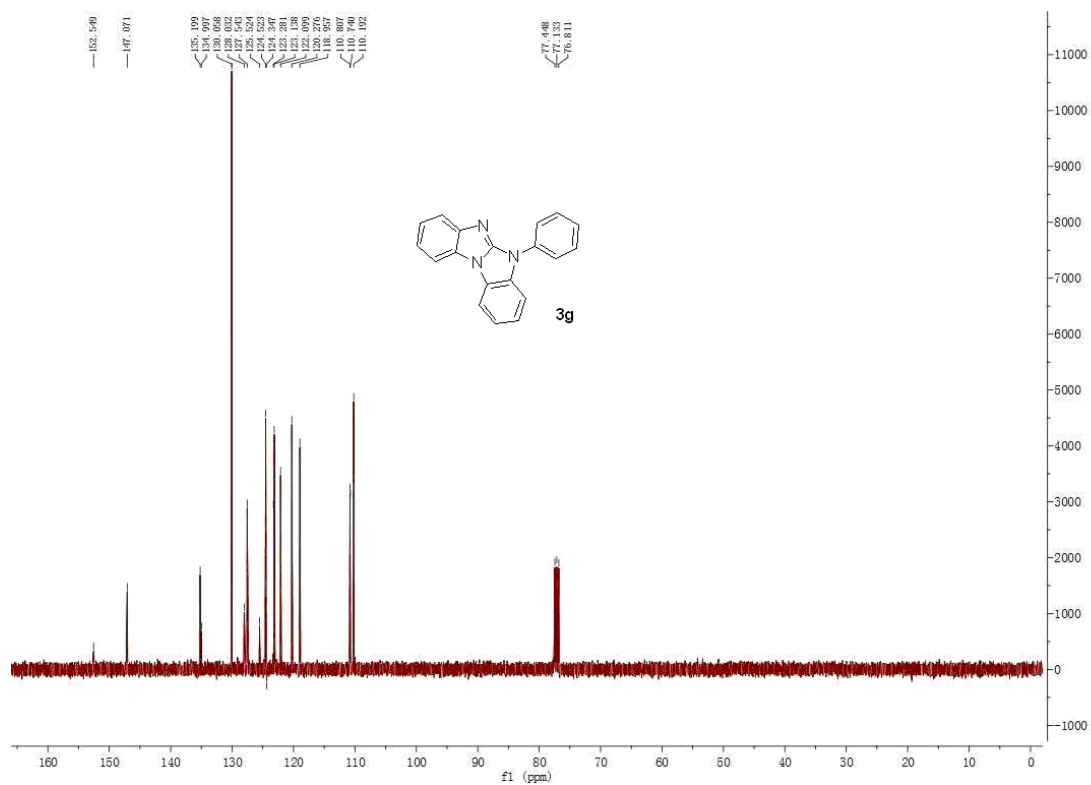



3h:

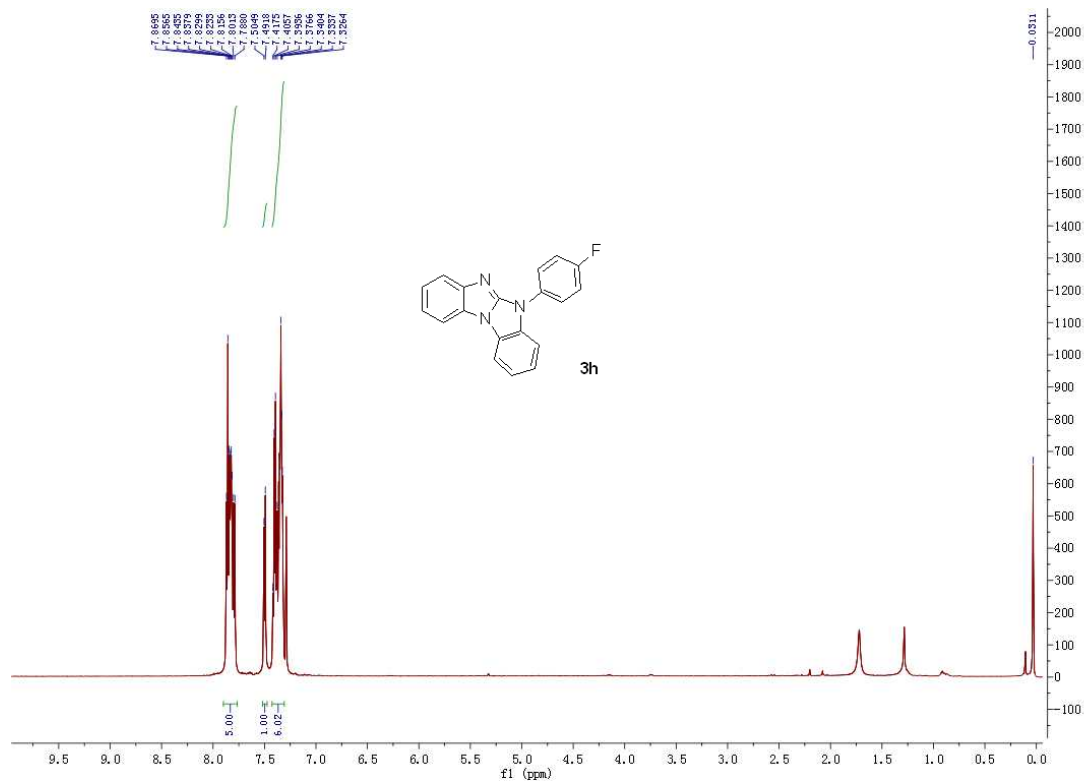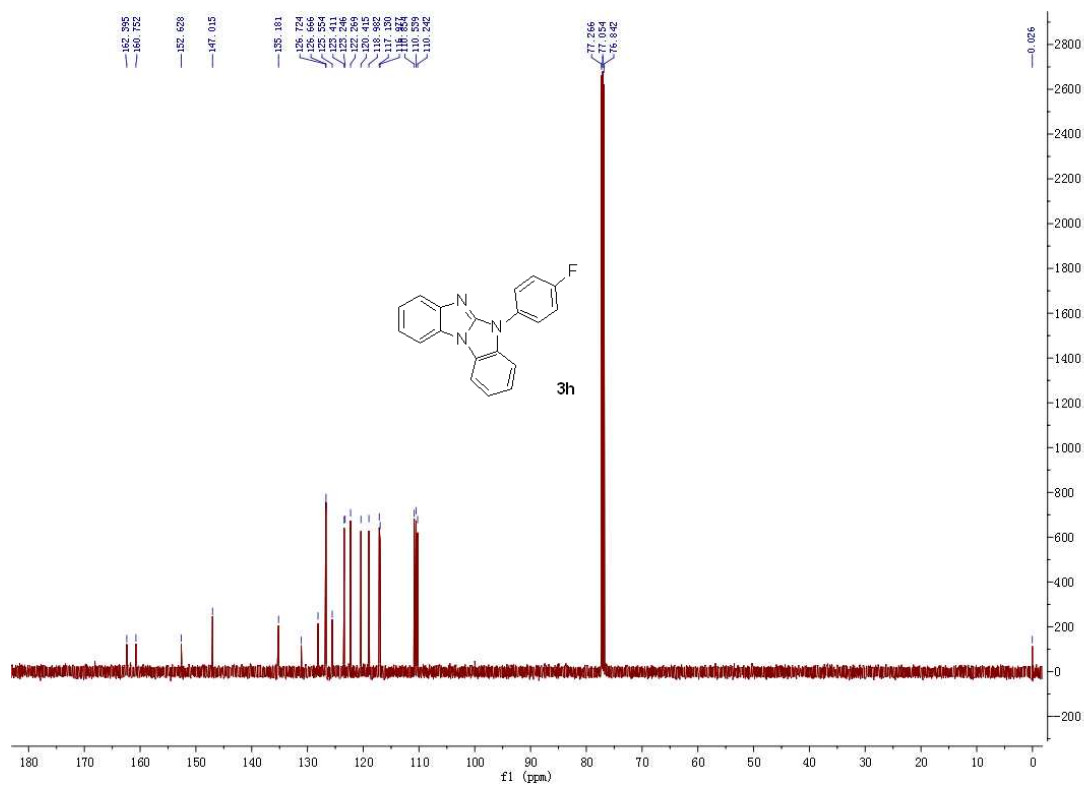

3i:

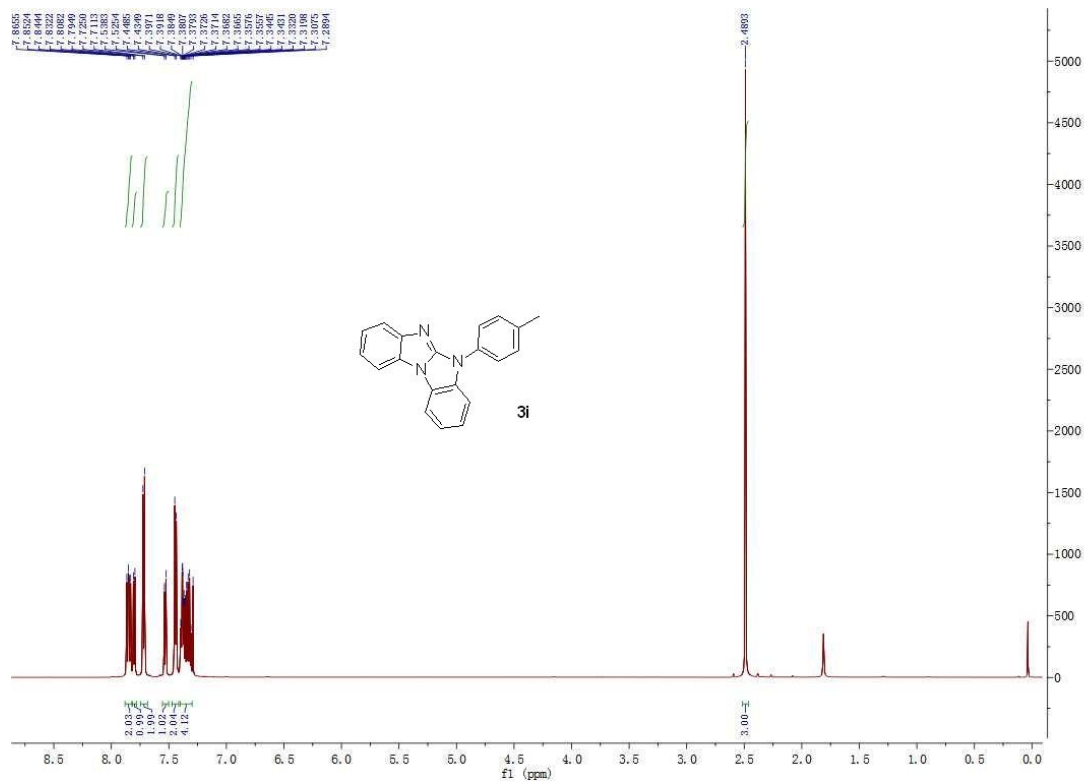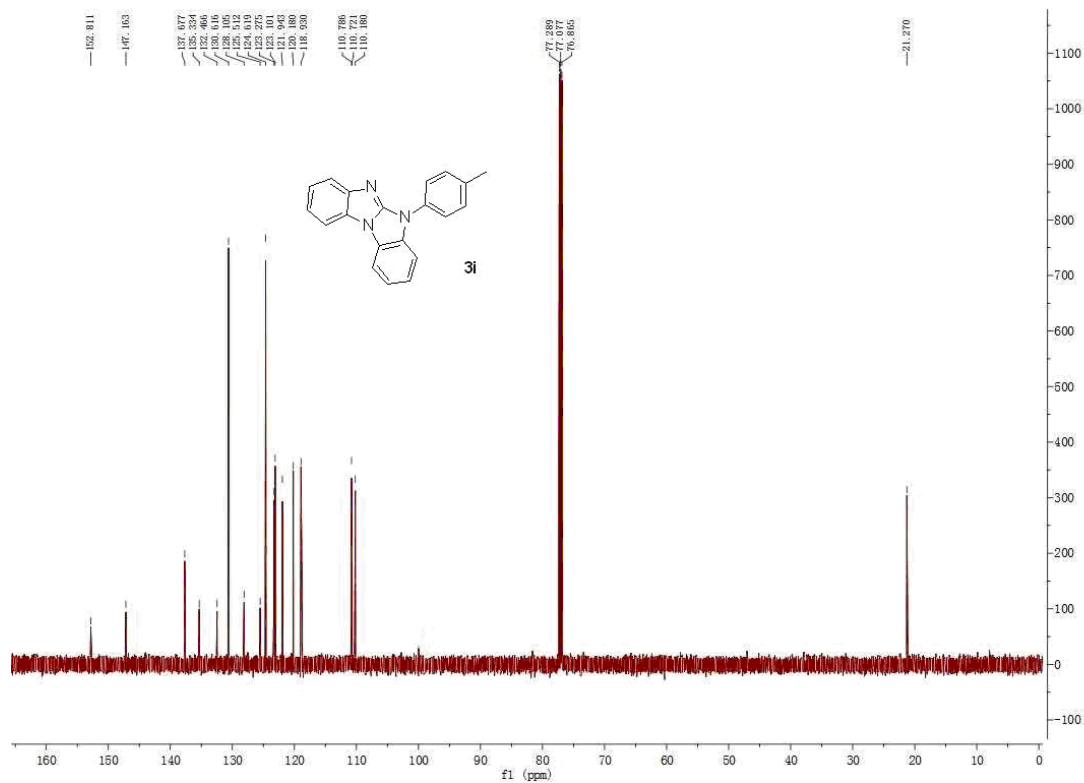

3j:

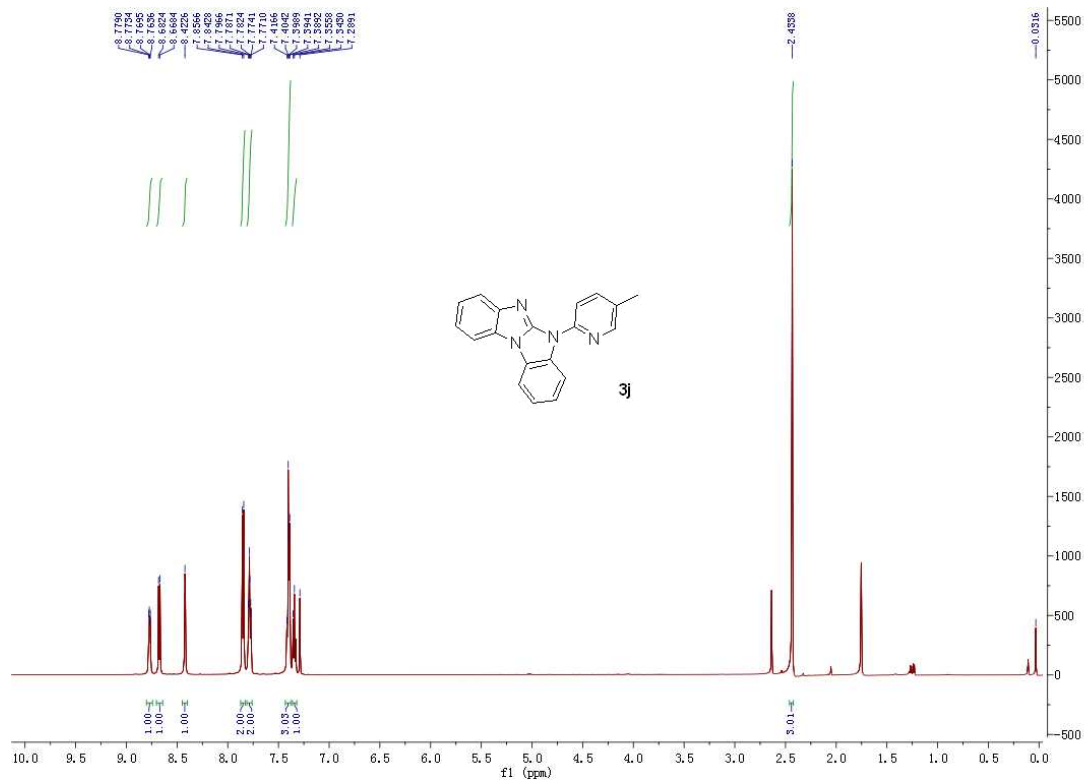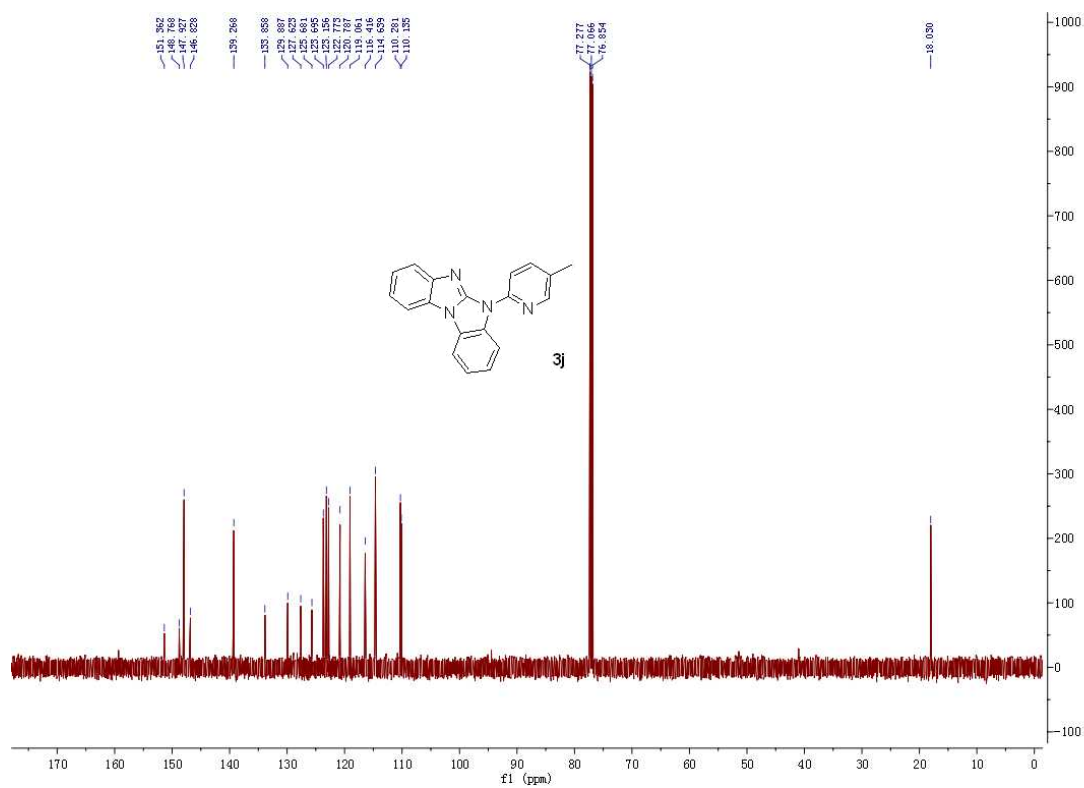

3k:

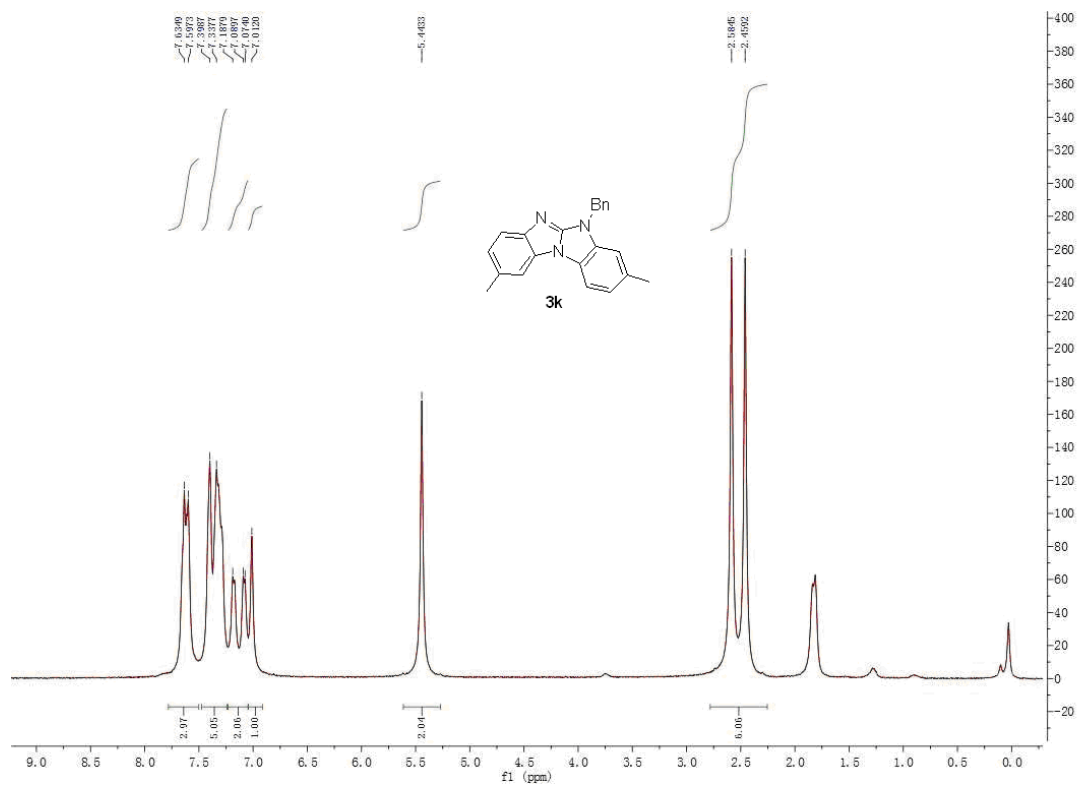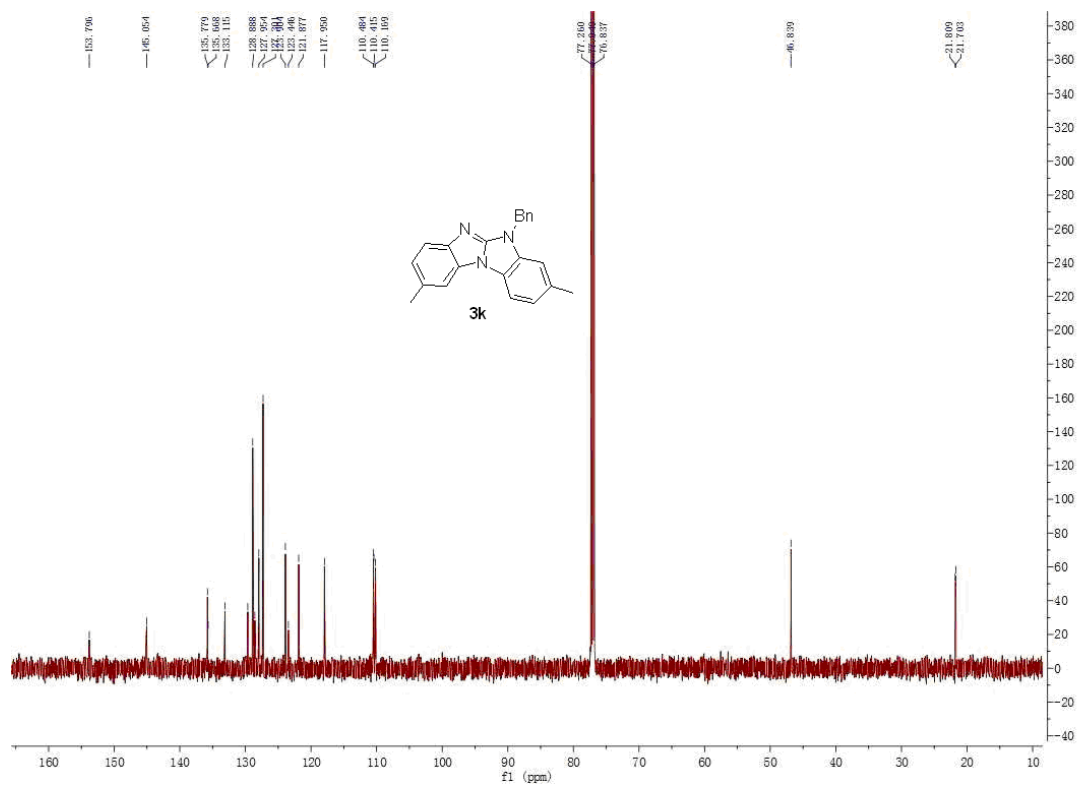

3l:

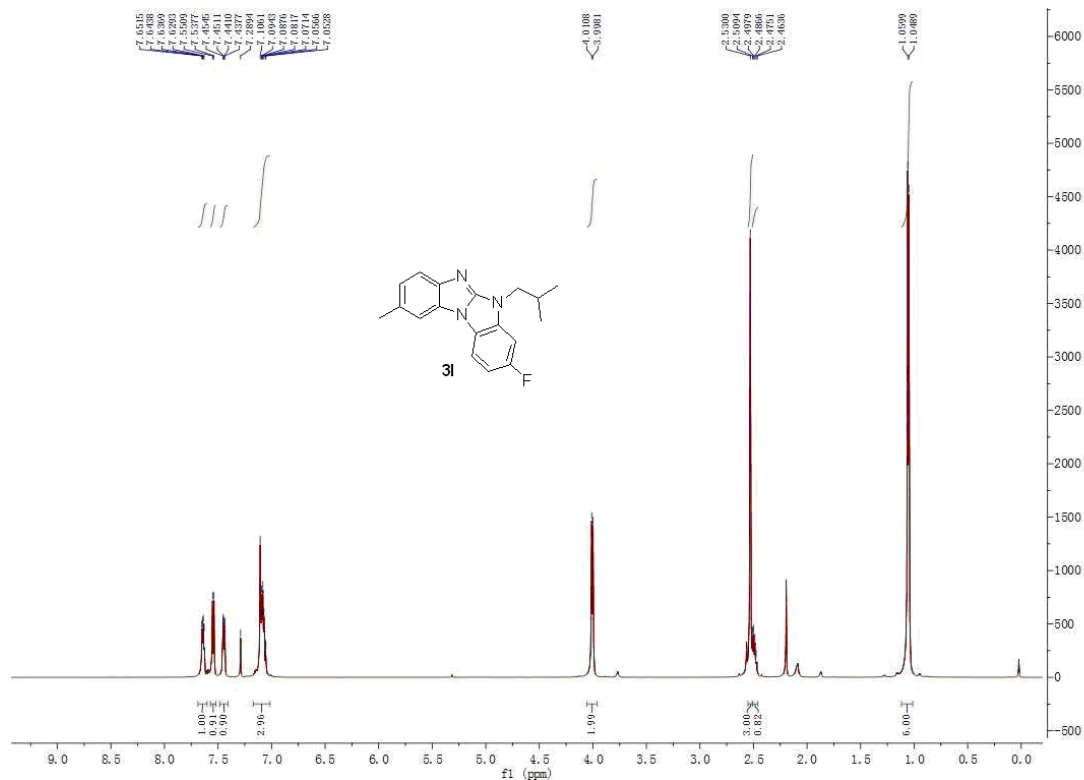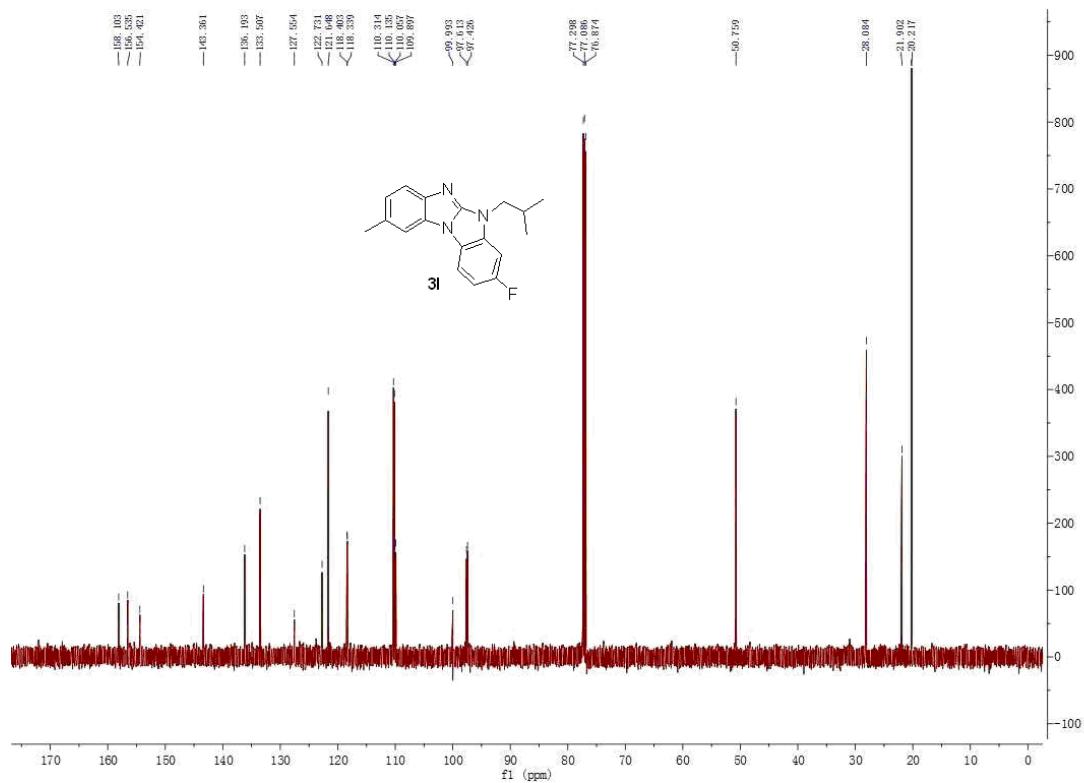

3m:

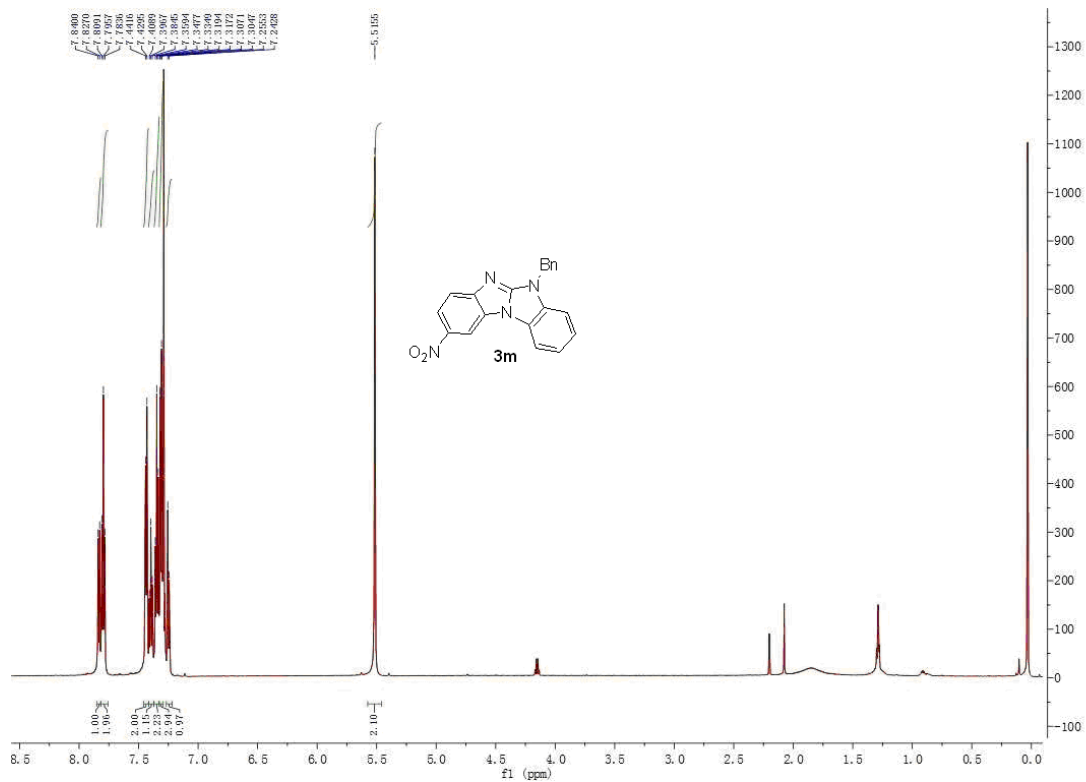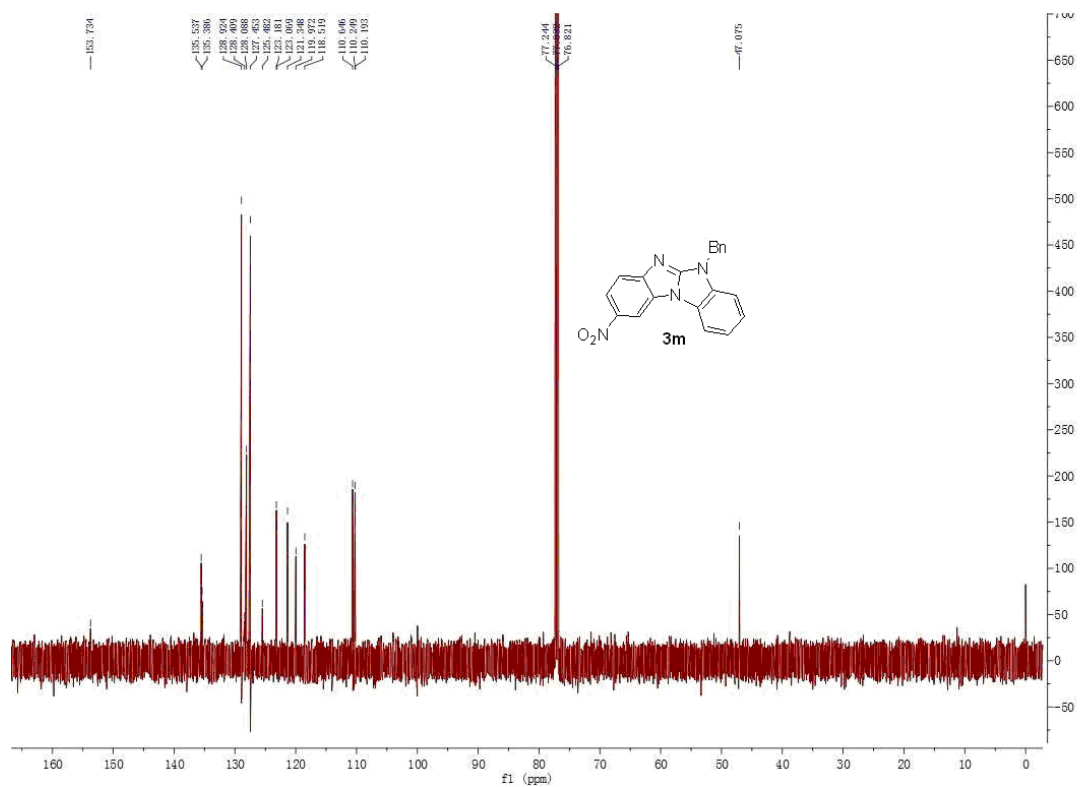

**3n:**

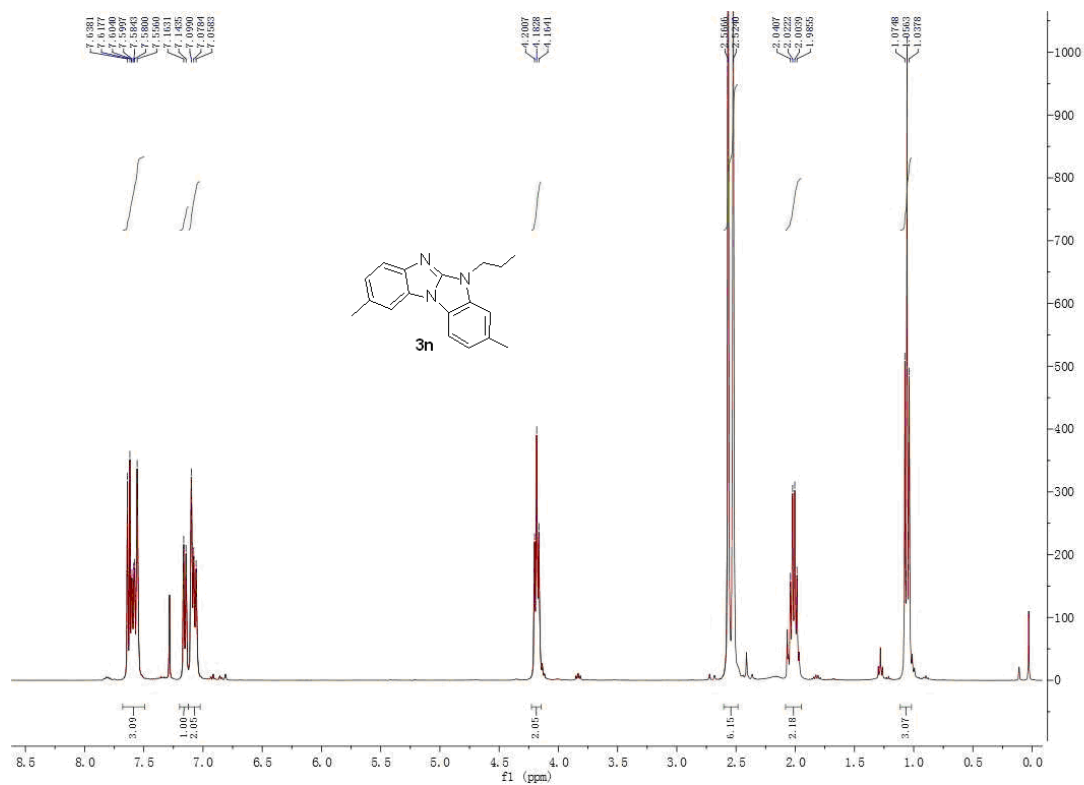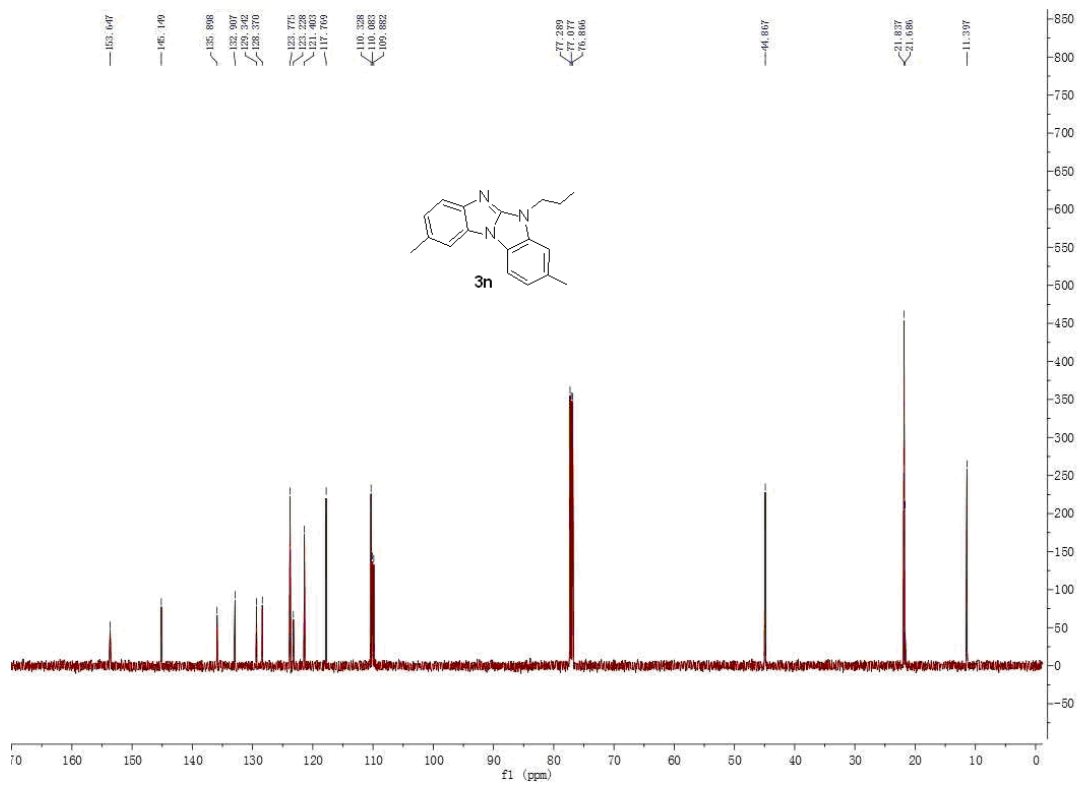

3o:

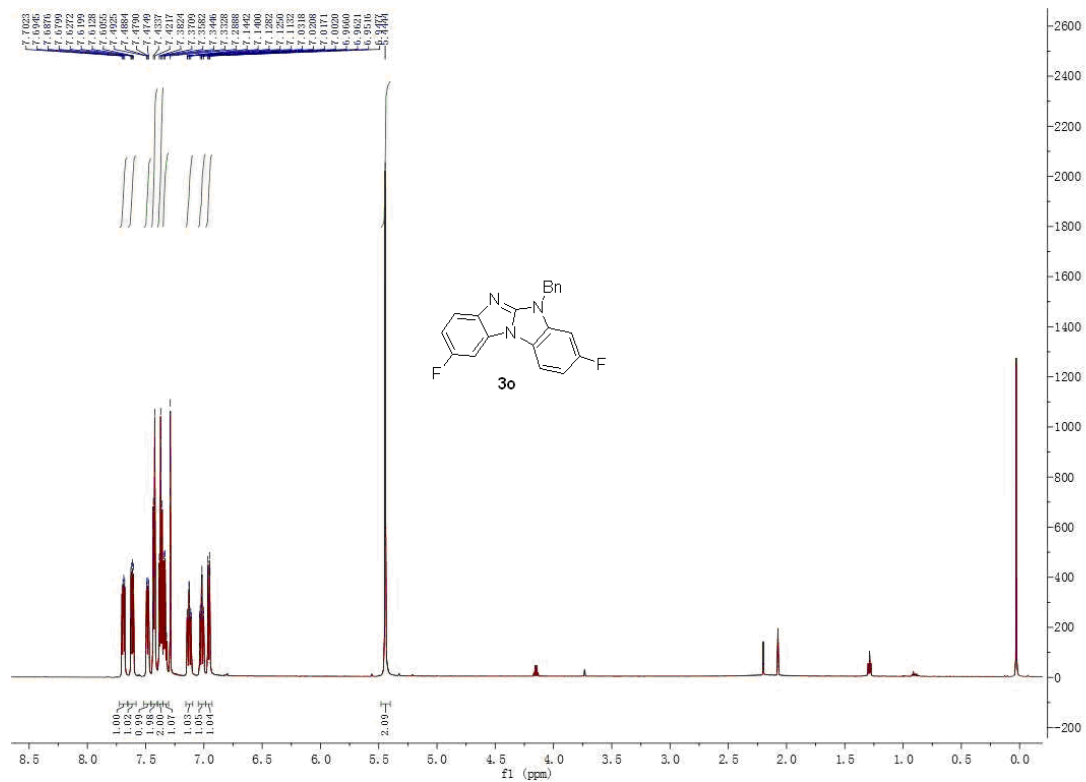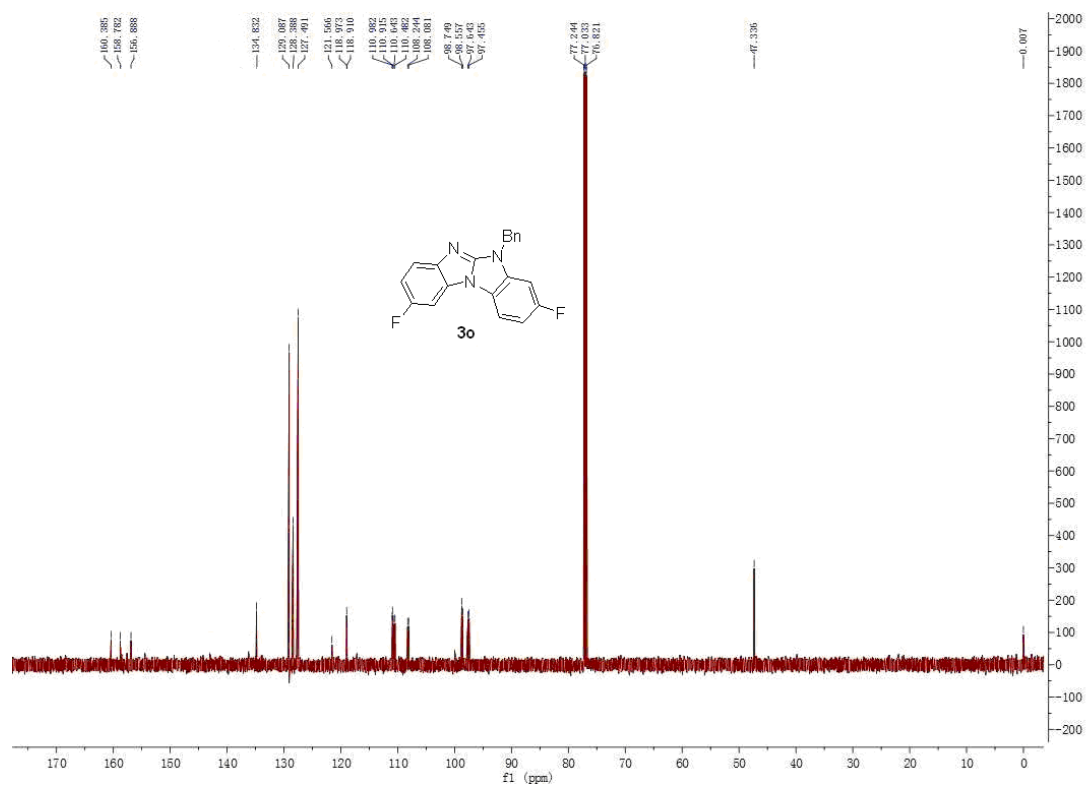



3p:

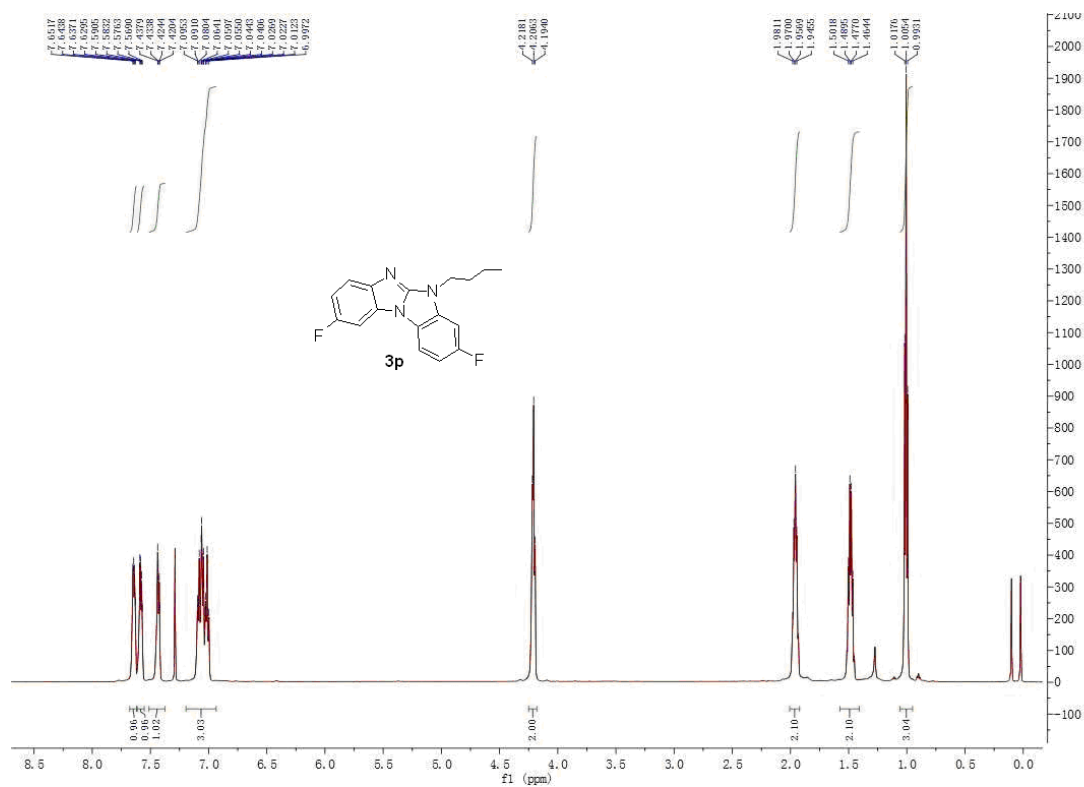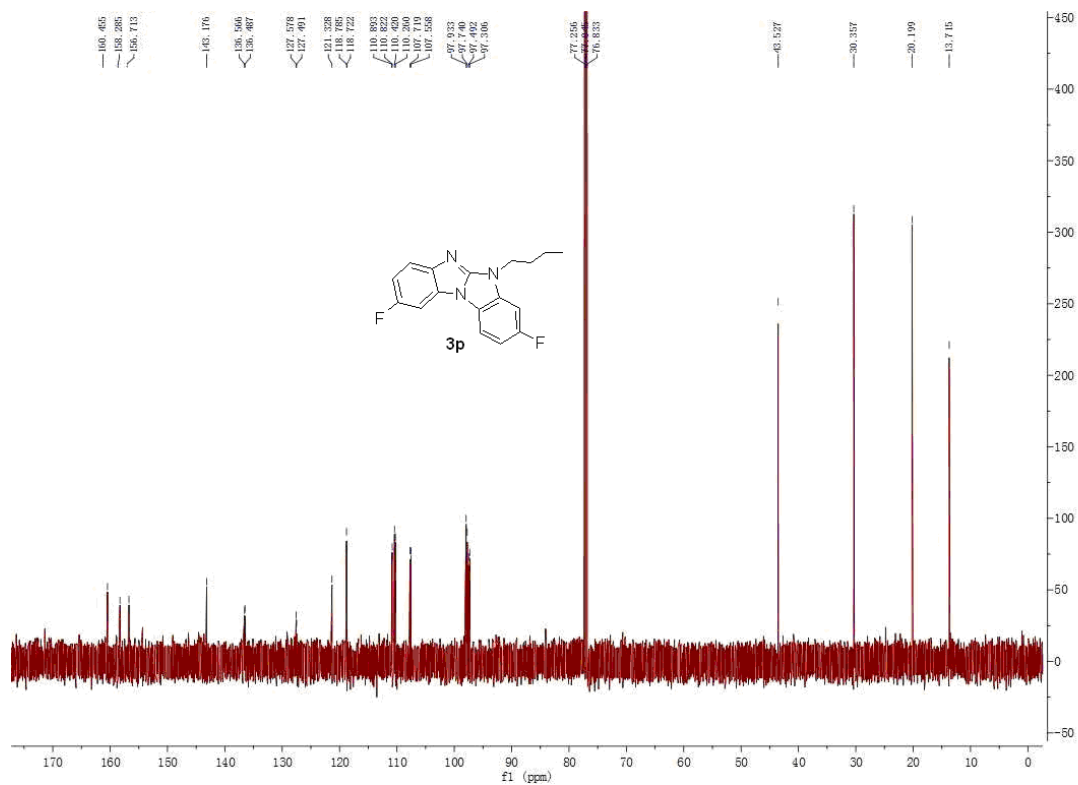

3q:

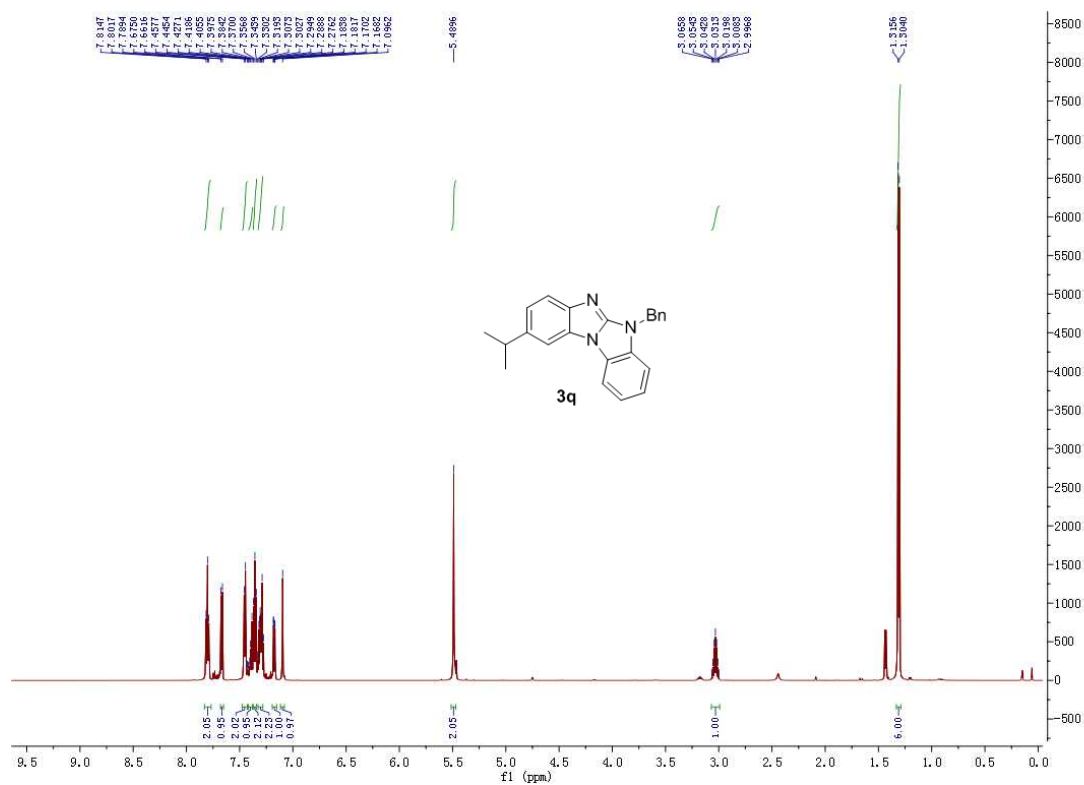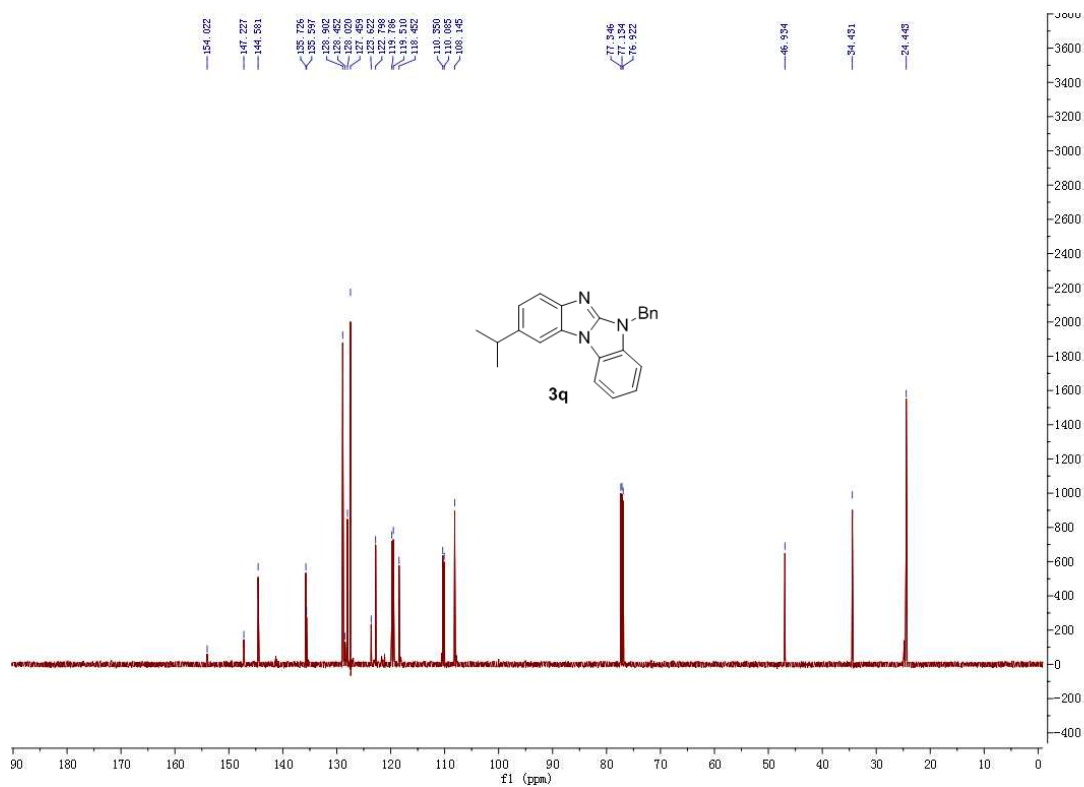

3r:

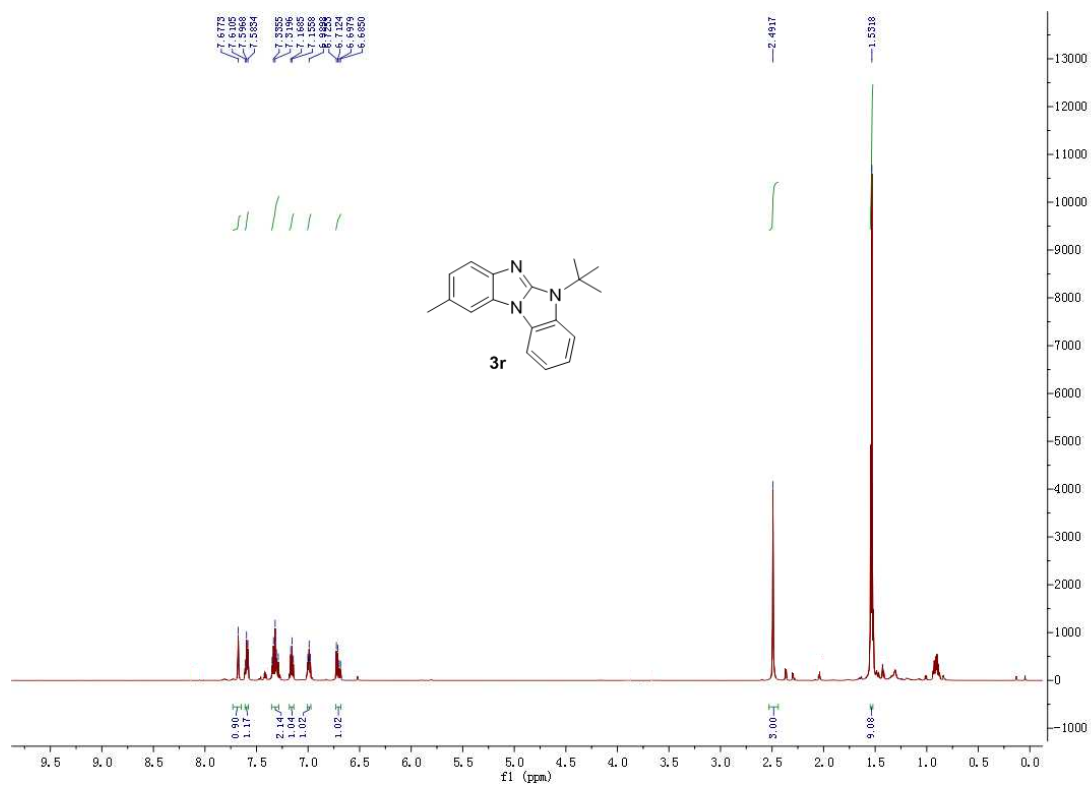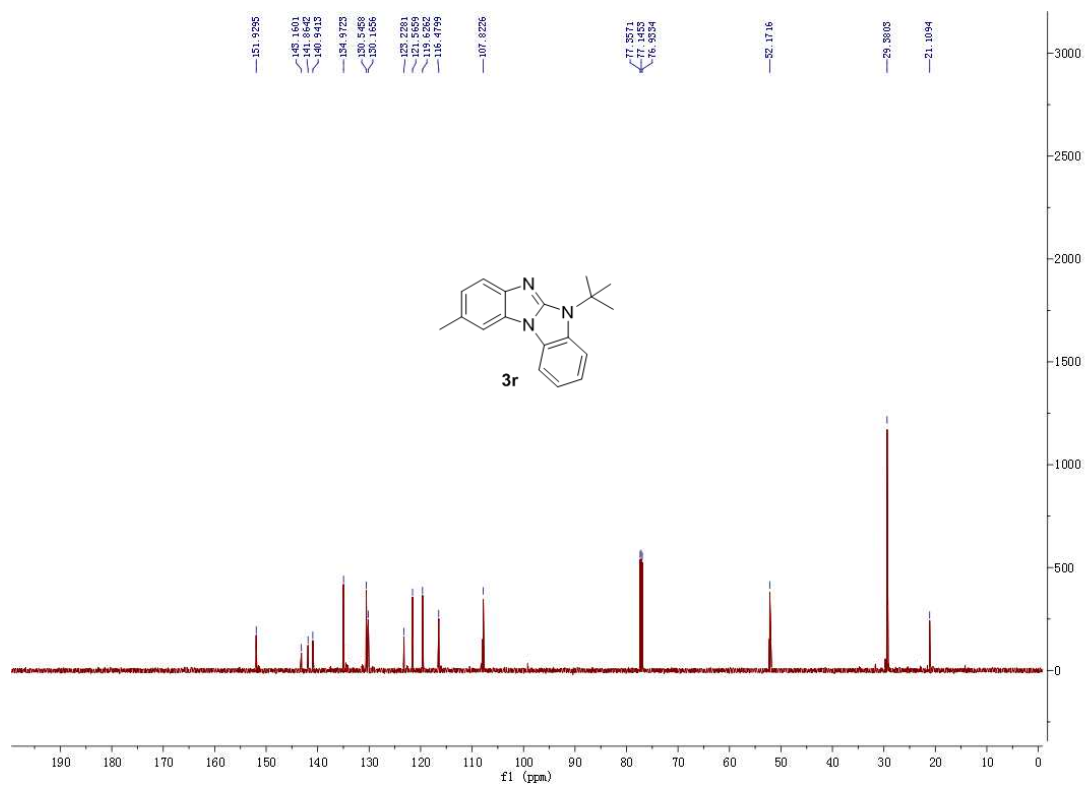





3u + 3u':

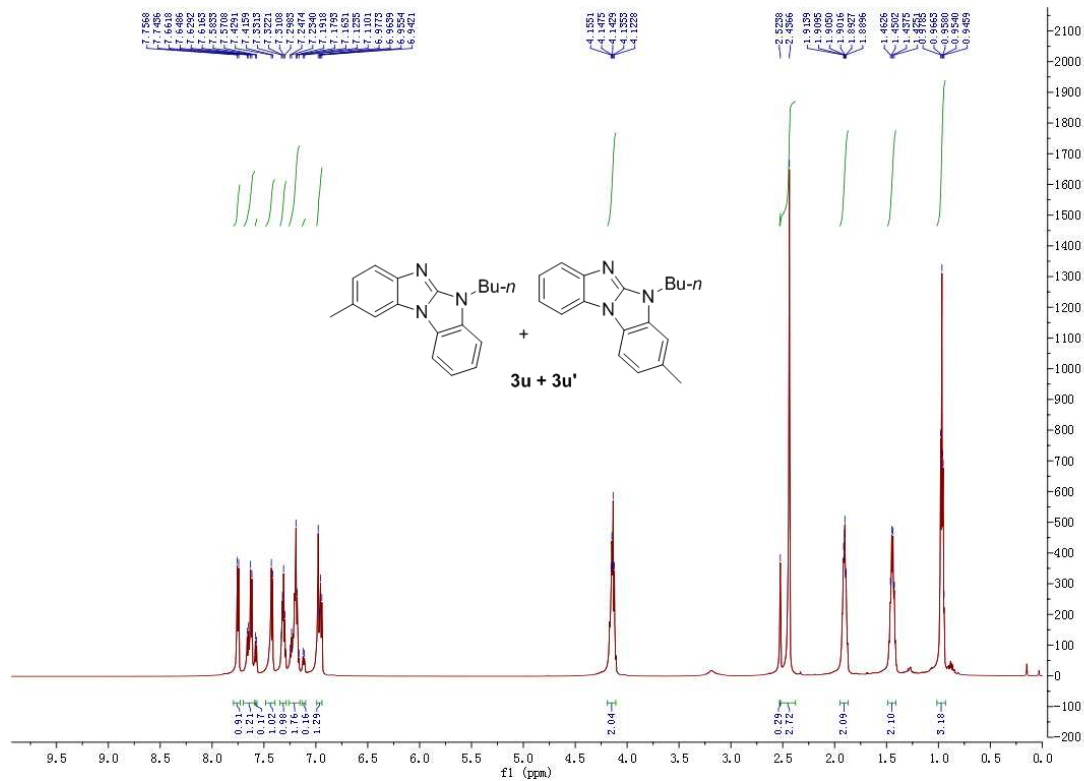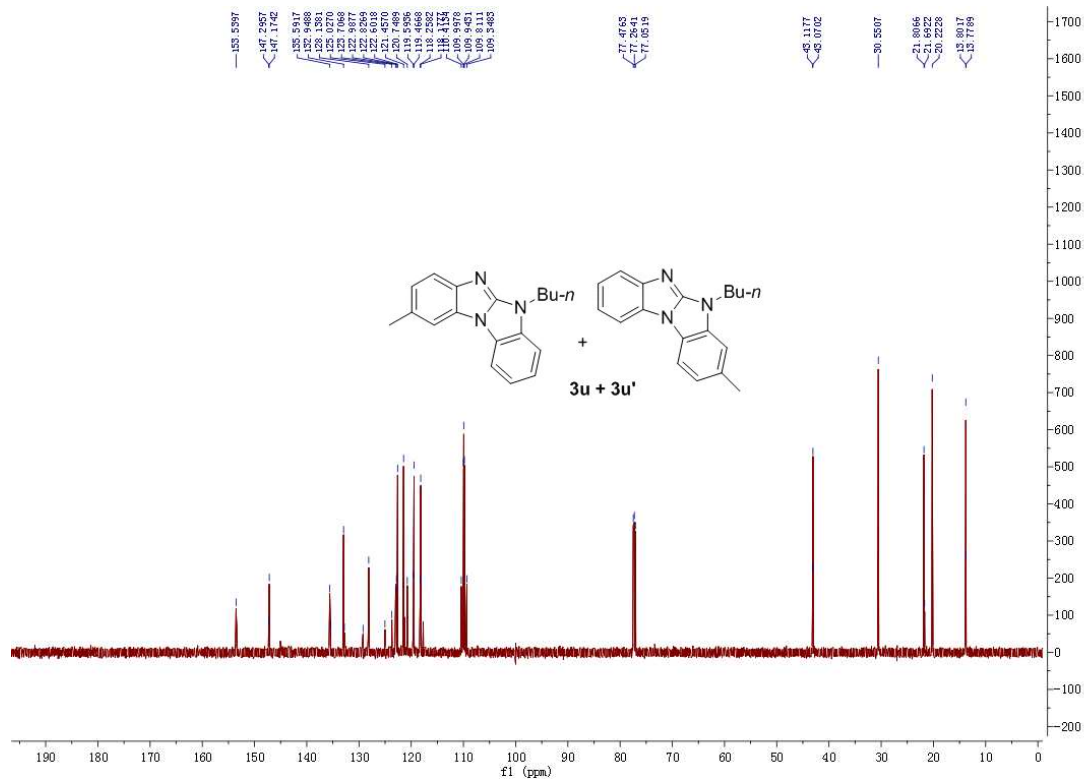

Supplement: c4ra01181c1.pdf [file c4ra01181c1.pdf]
